# Supplementary material for: Single Cell Mass Cytometry Revealed the Immunomodulatory Effect of Cisplatin Via Downregulation of Splenic CD44+, IL-17A+ MDSCs and Promotion of Circulating IFN-γ+ Myeloid Cells in the 4T1 Metastatic Breast Cancer Model
Source: MDPI journal article supplement (doi:10.3390/ijms21010170), 2019-12-25

CD4+ T-cells

**Figure S3.** Manual gating strategy of spleen -derived leukocytes of naive, 4T1 tumor bearing and cisplatin treated 4T1 tumorous mice

Naive

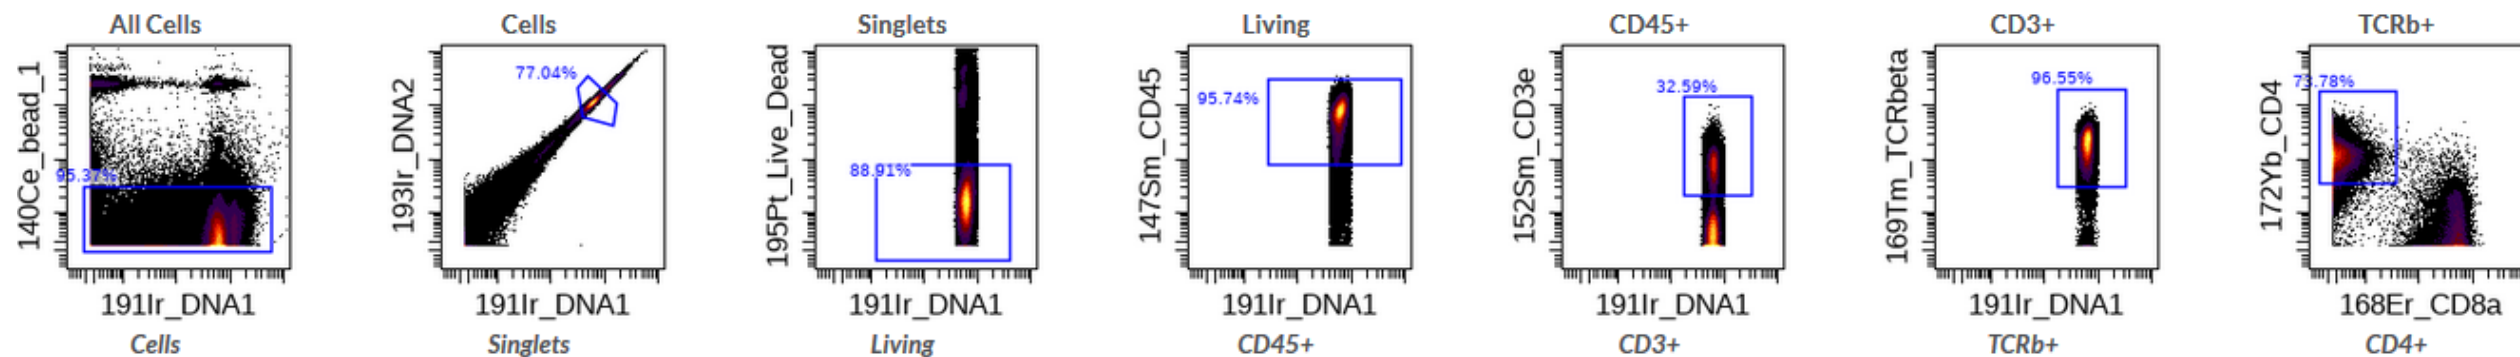

4T1

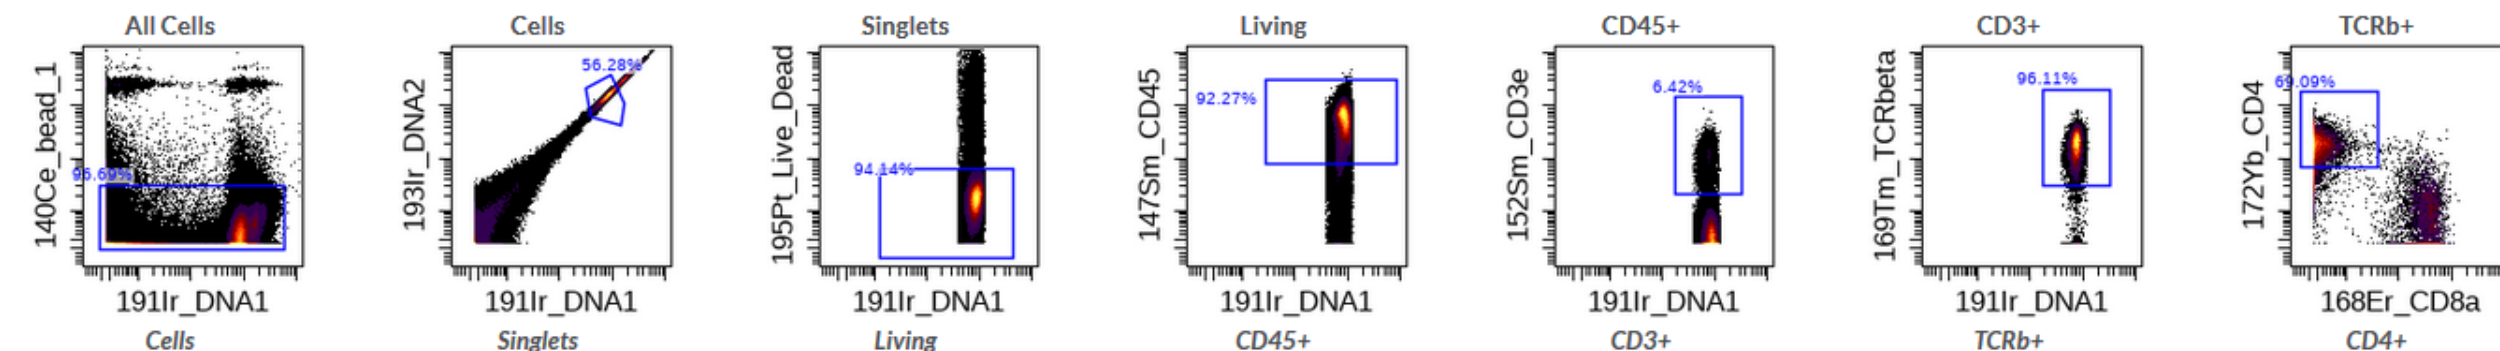

4T1  
+  
cisplatin

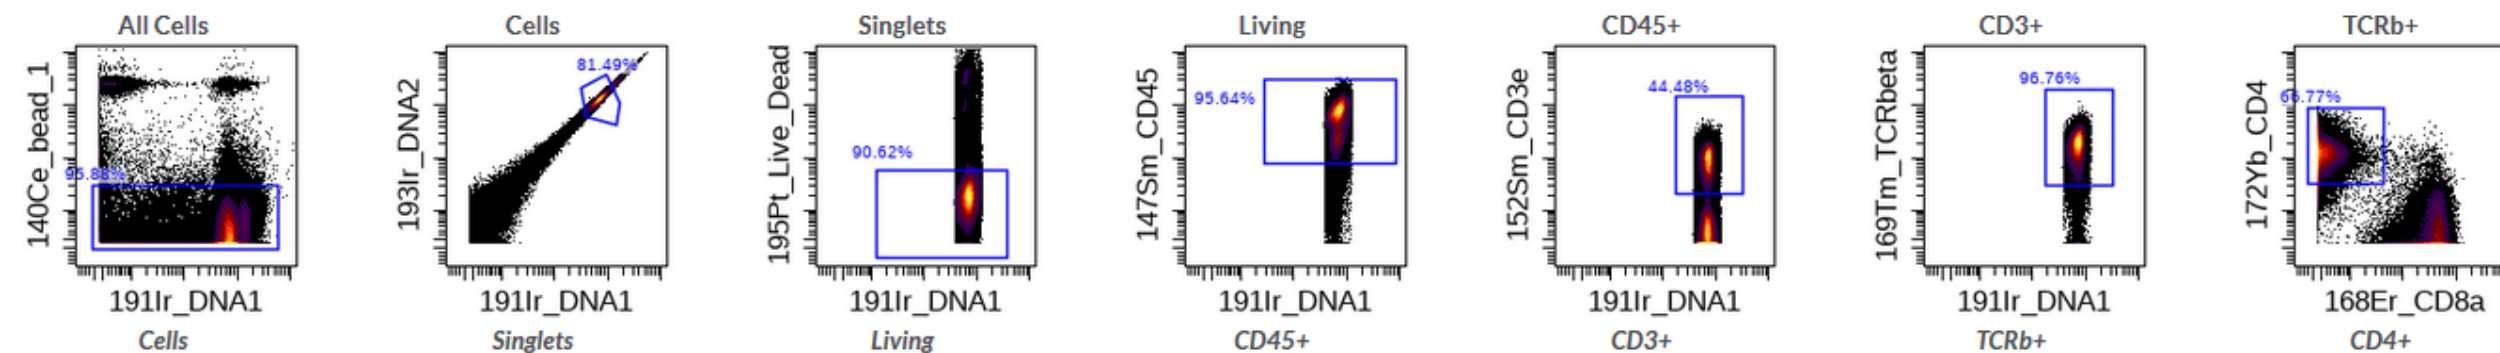

# CD8+ T-cells

Naive

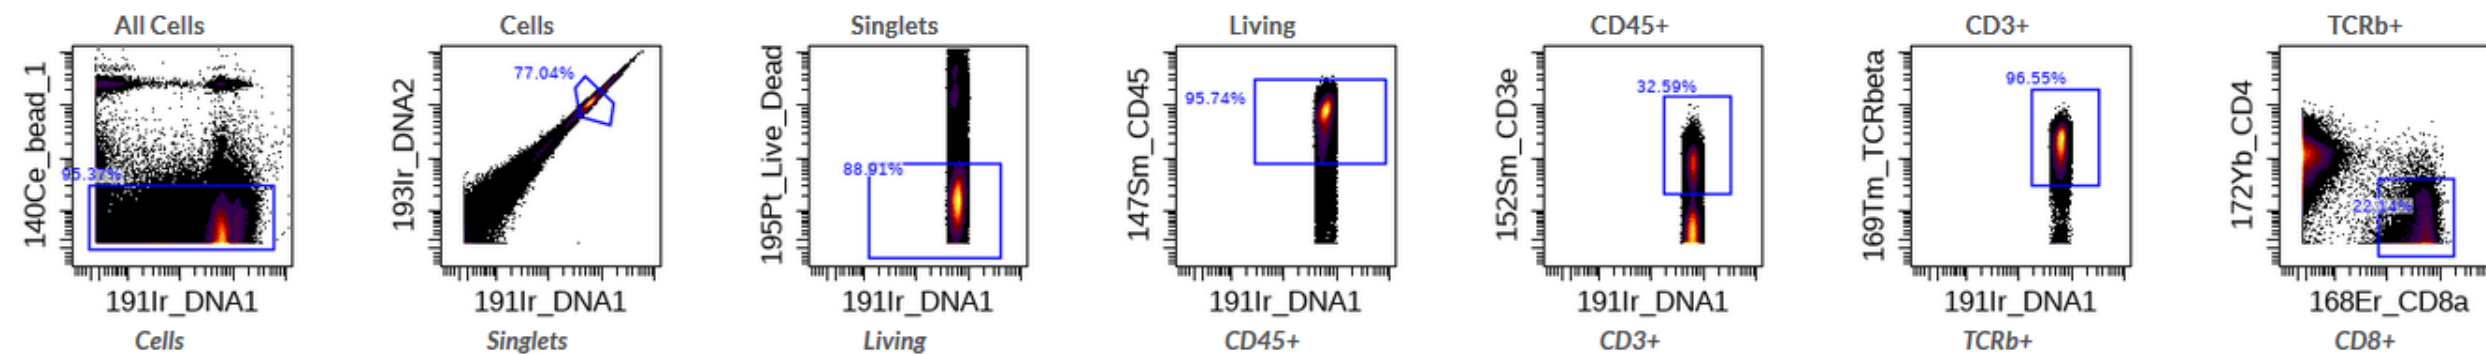

4T1

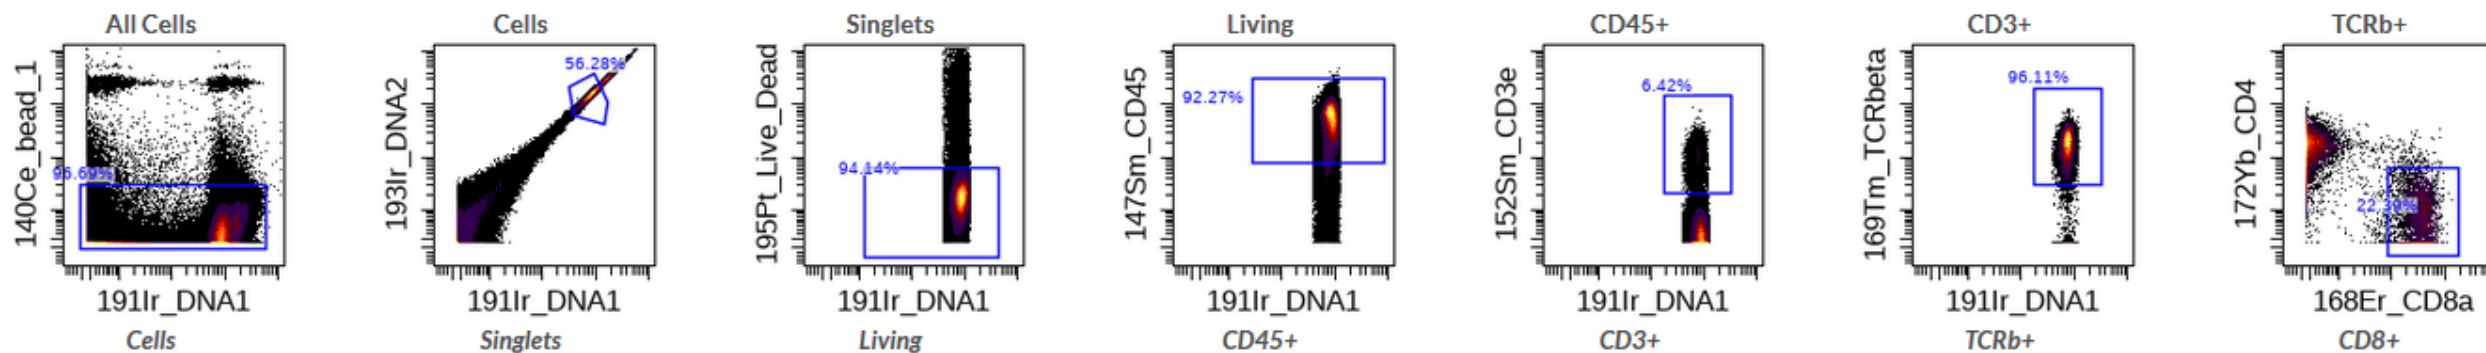

4T1  
+  
cisplatin

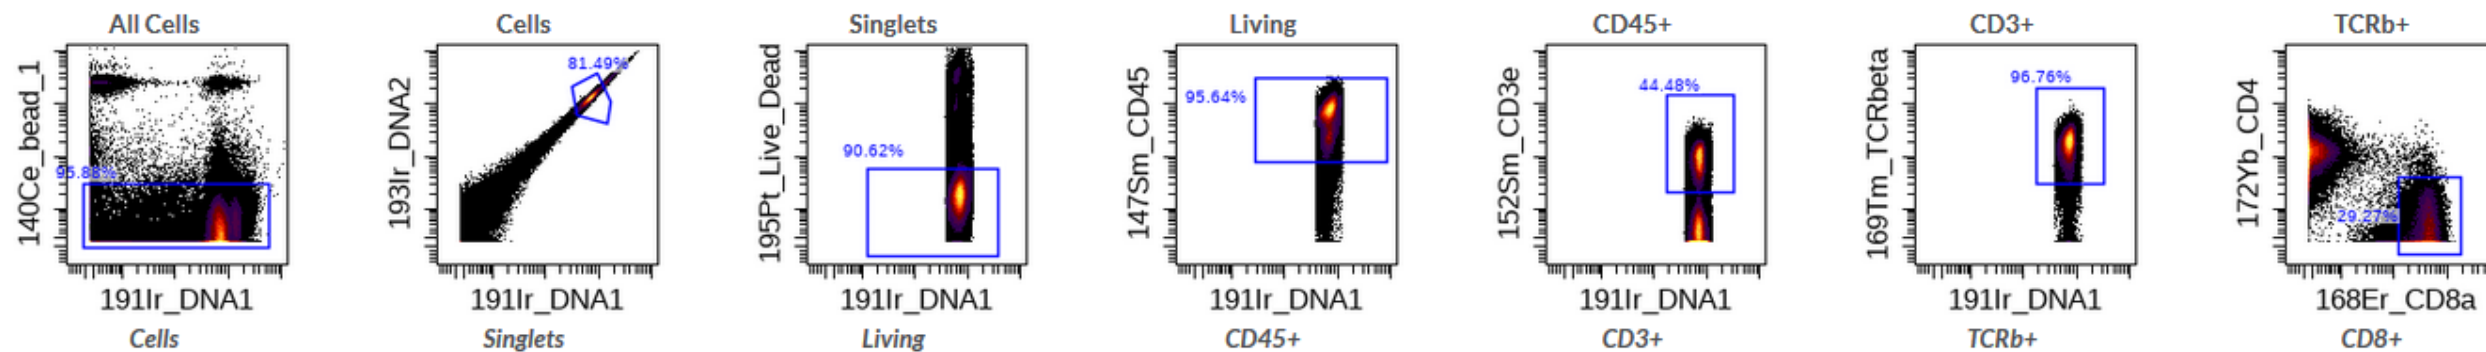

# CD19+ B-cells

Naive

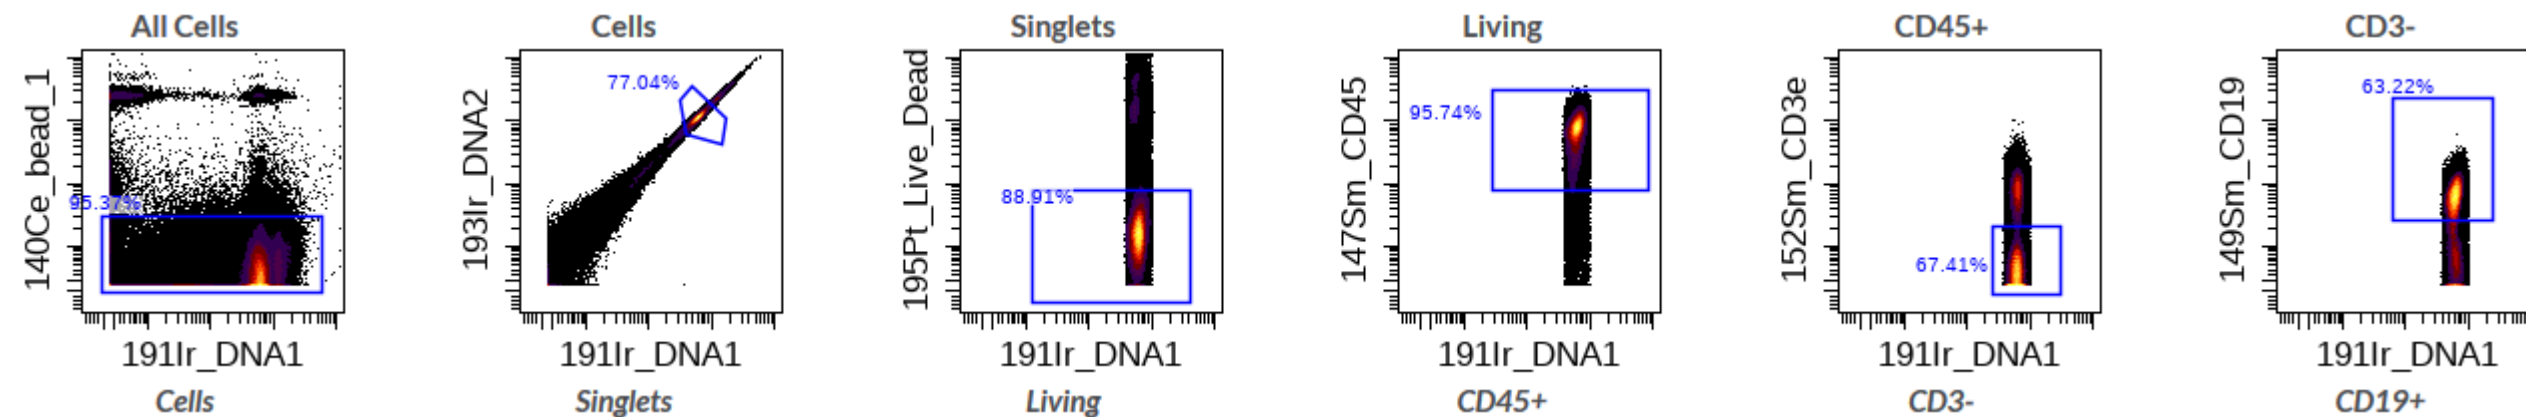

4T1

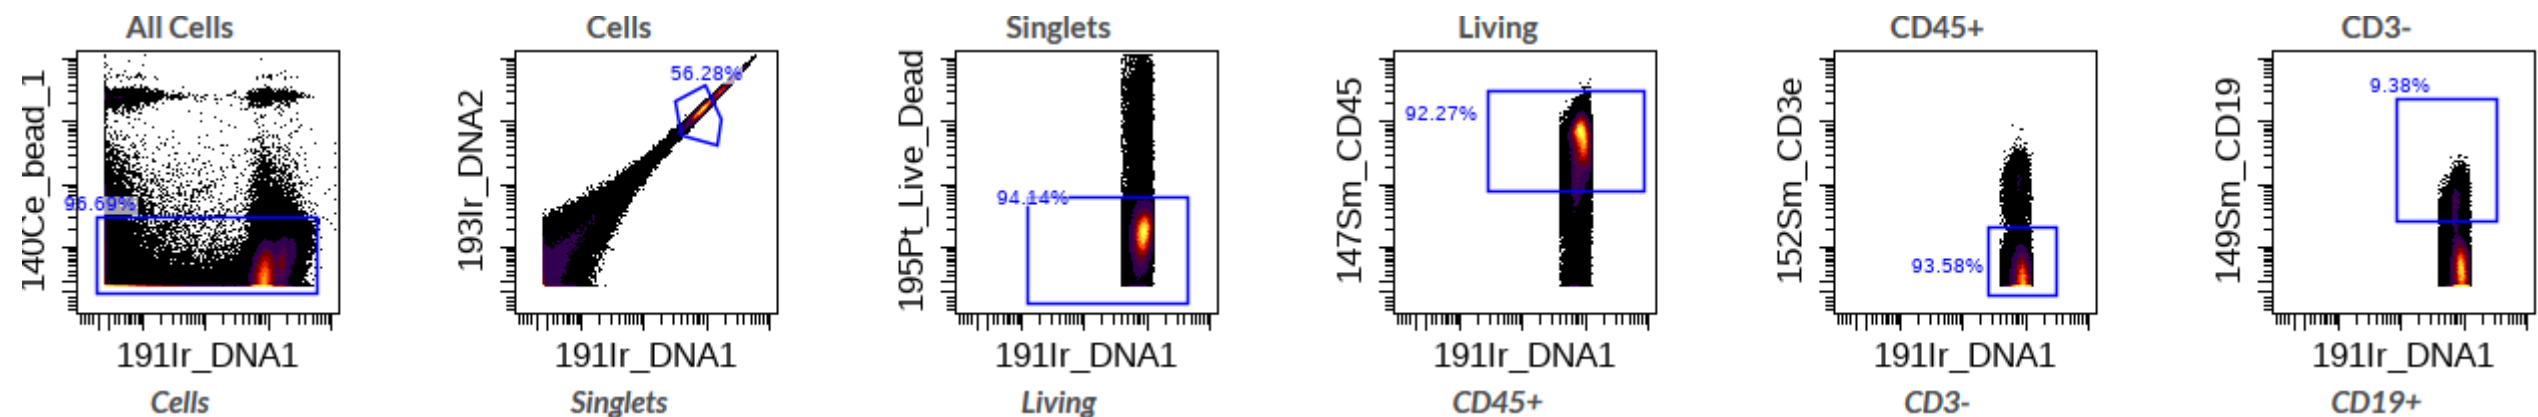

4T1  
+  
cisplatin

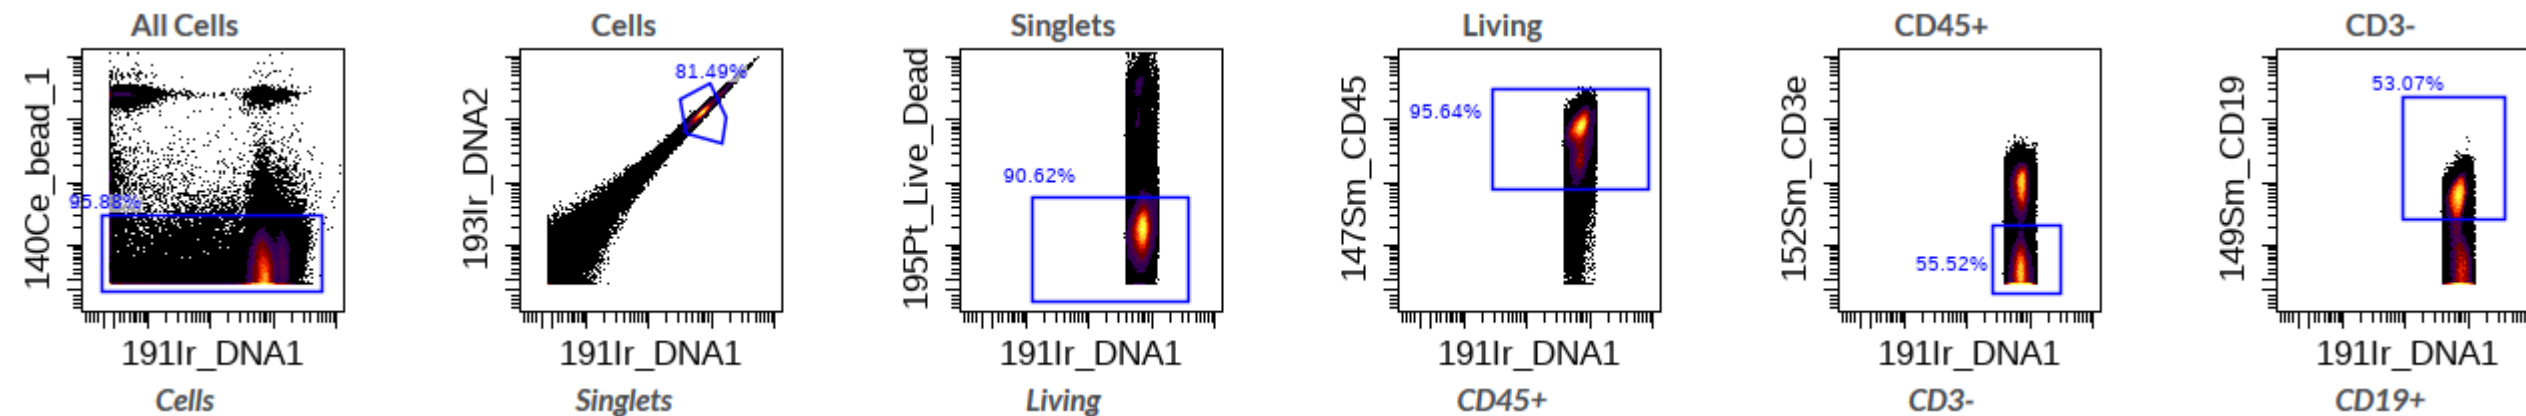

CD11b+

Naive

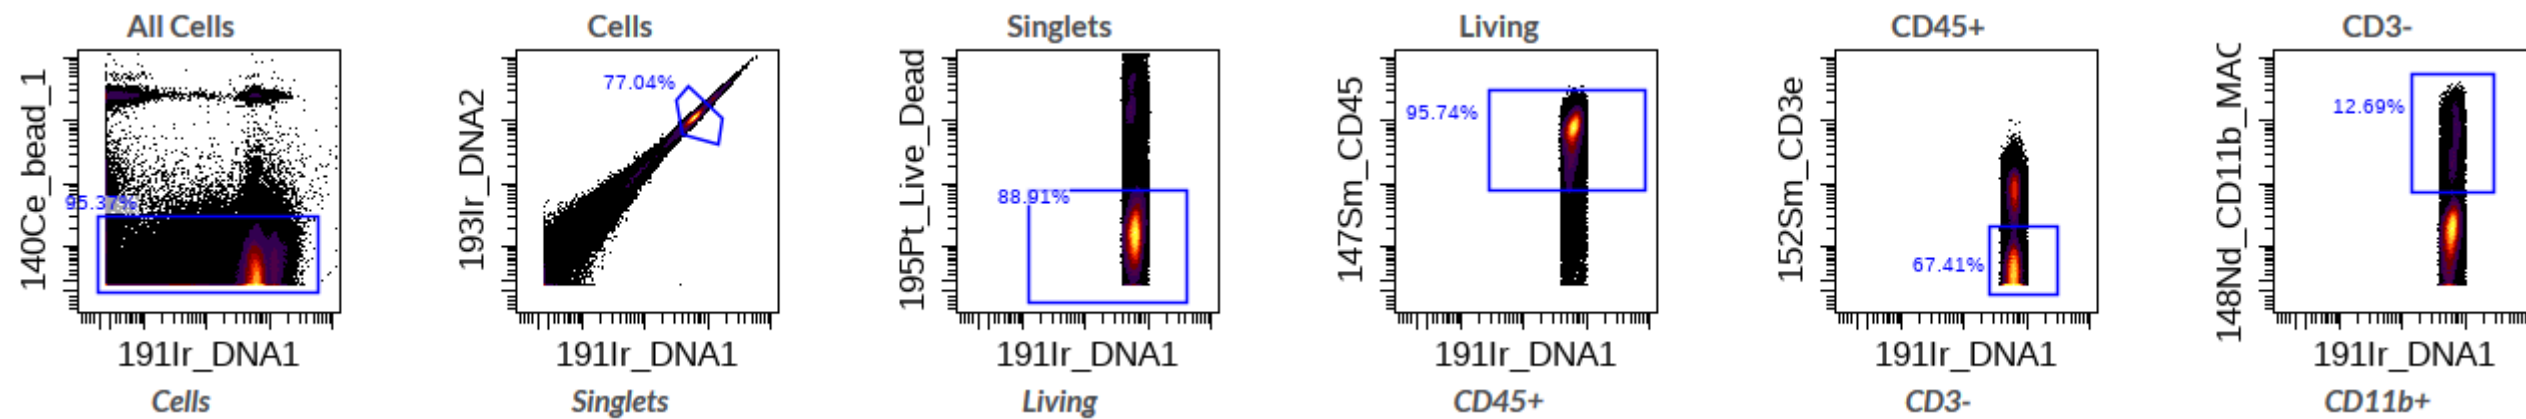

4T1

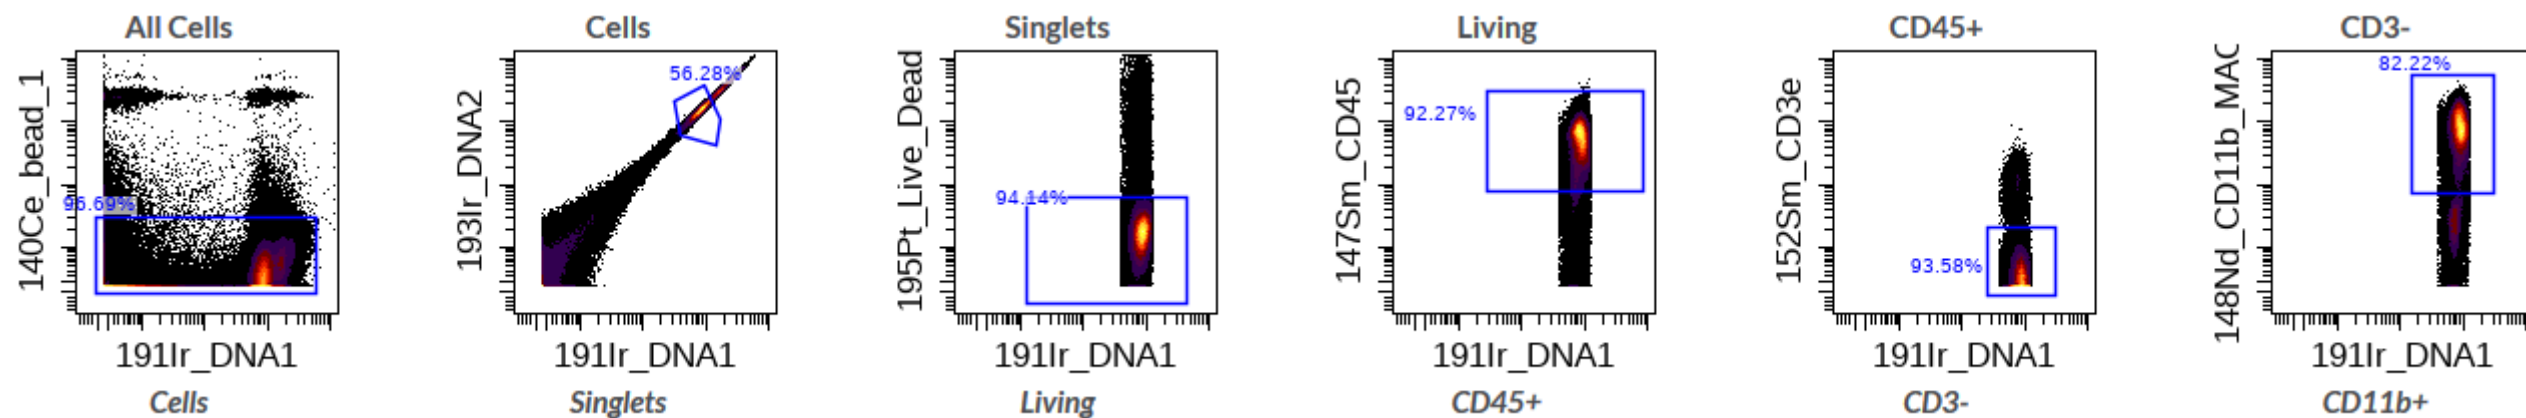

4T1  
+  
cisplatin

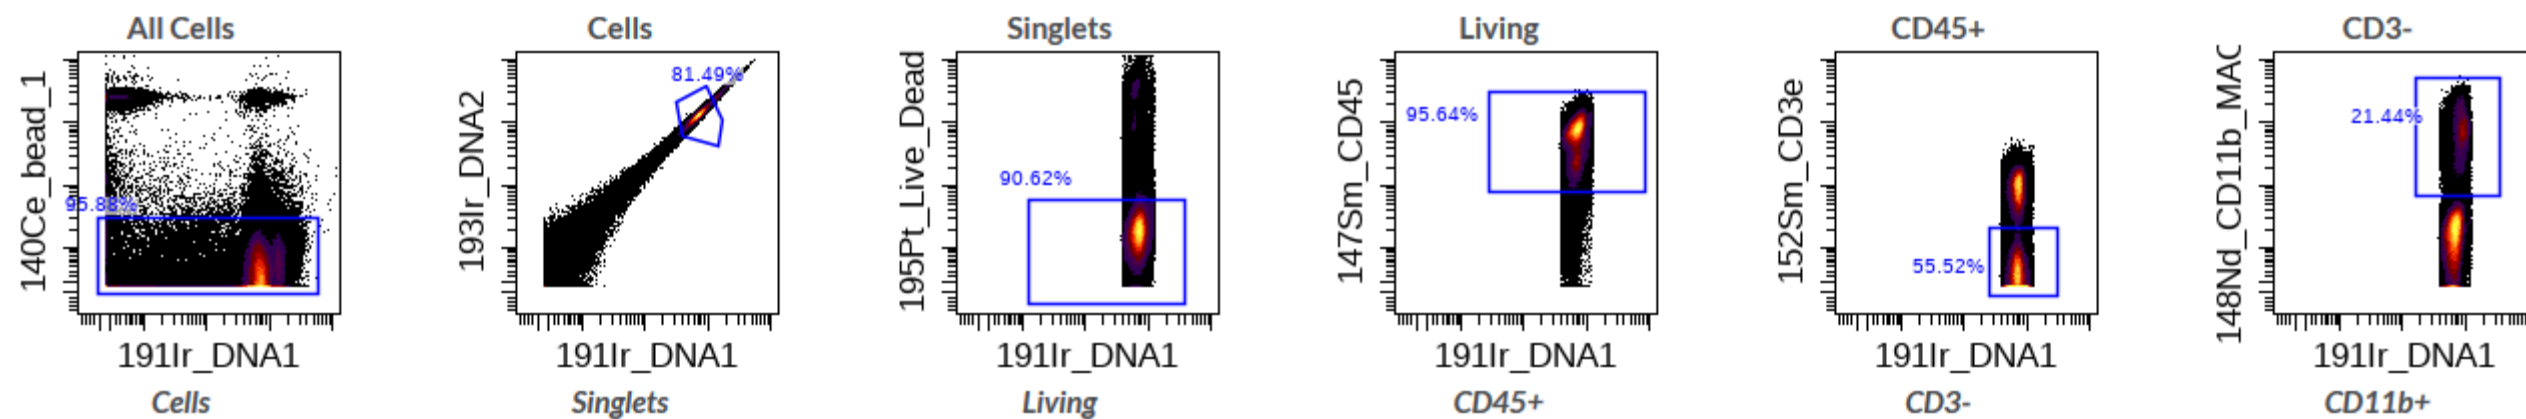



CD11c+

Naive

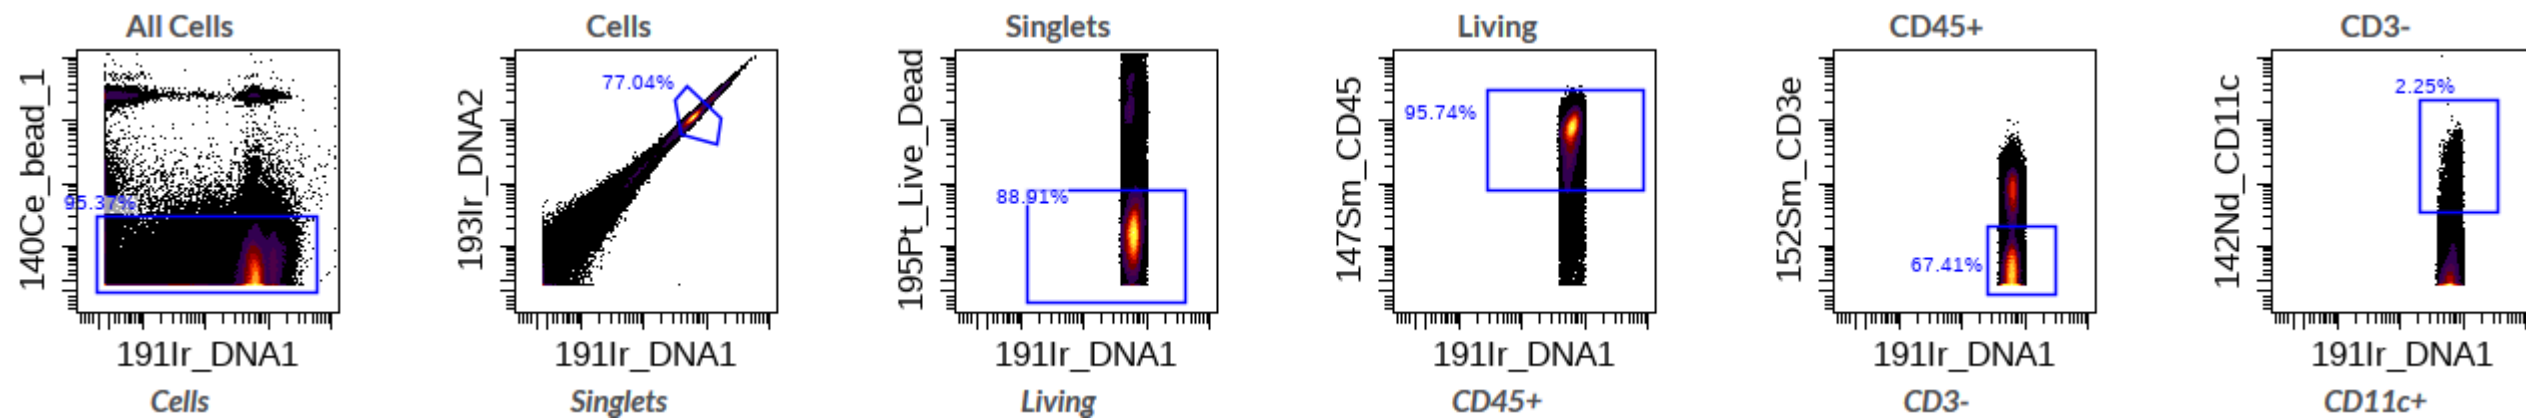

4T1

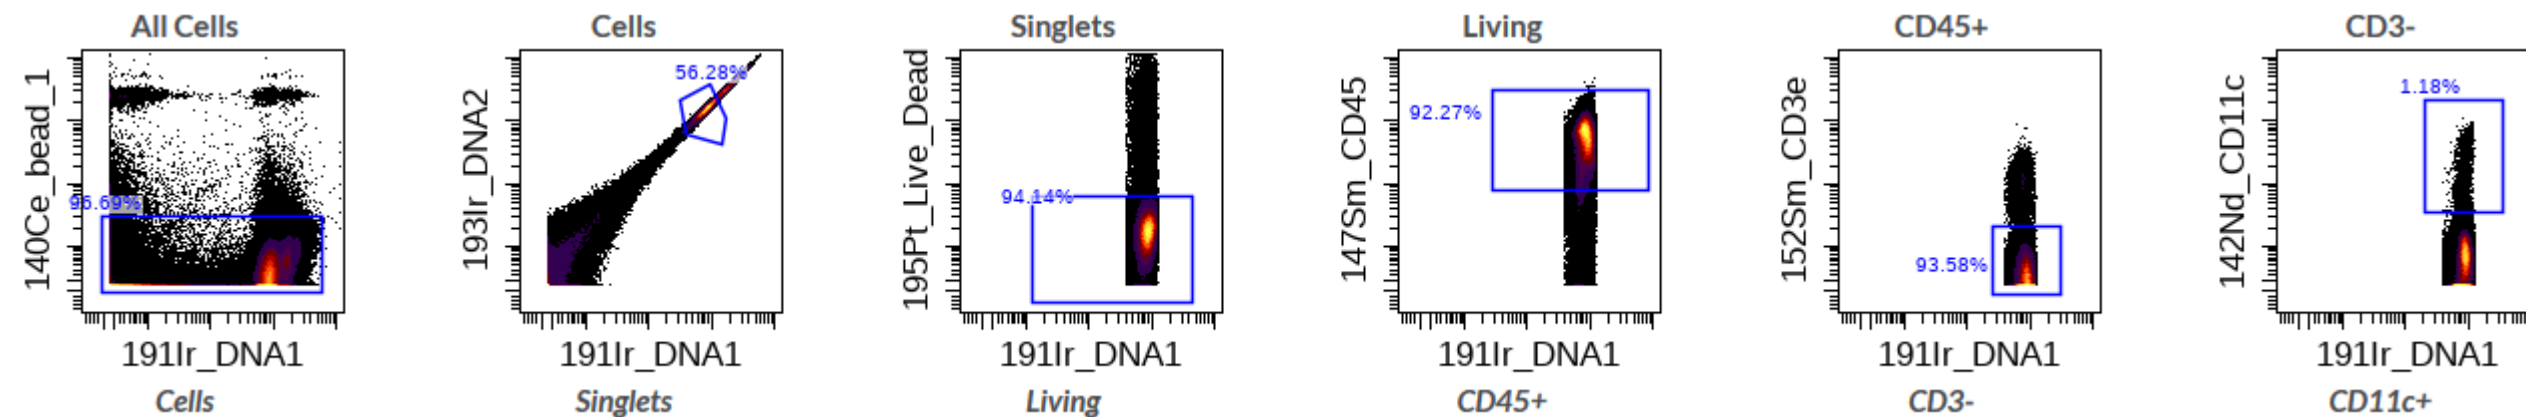

4T1  
+  
cisplatin

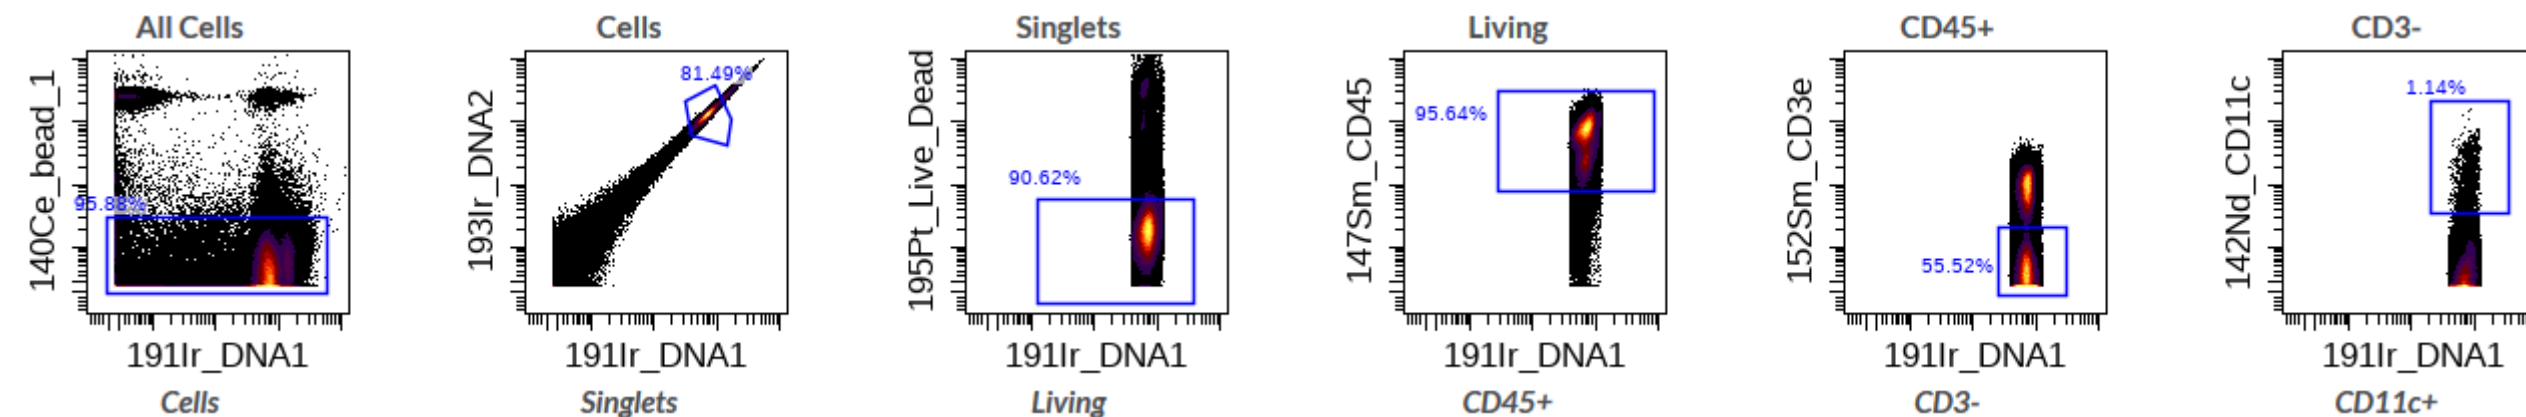

# MDSCs

Naive

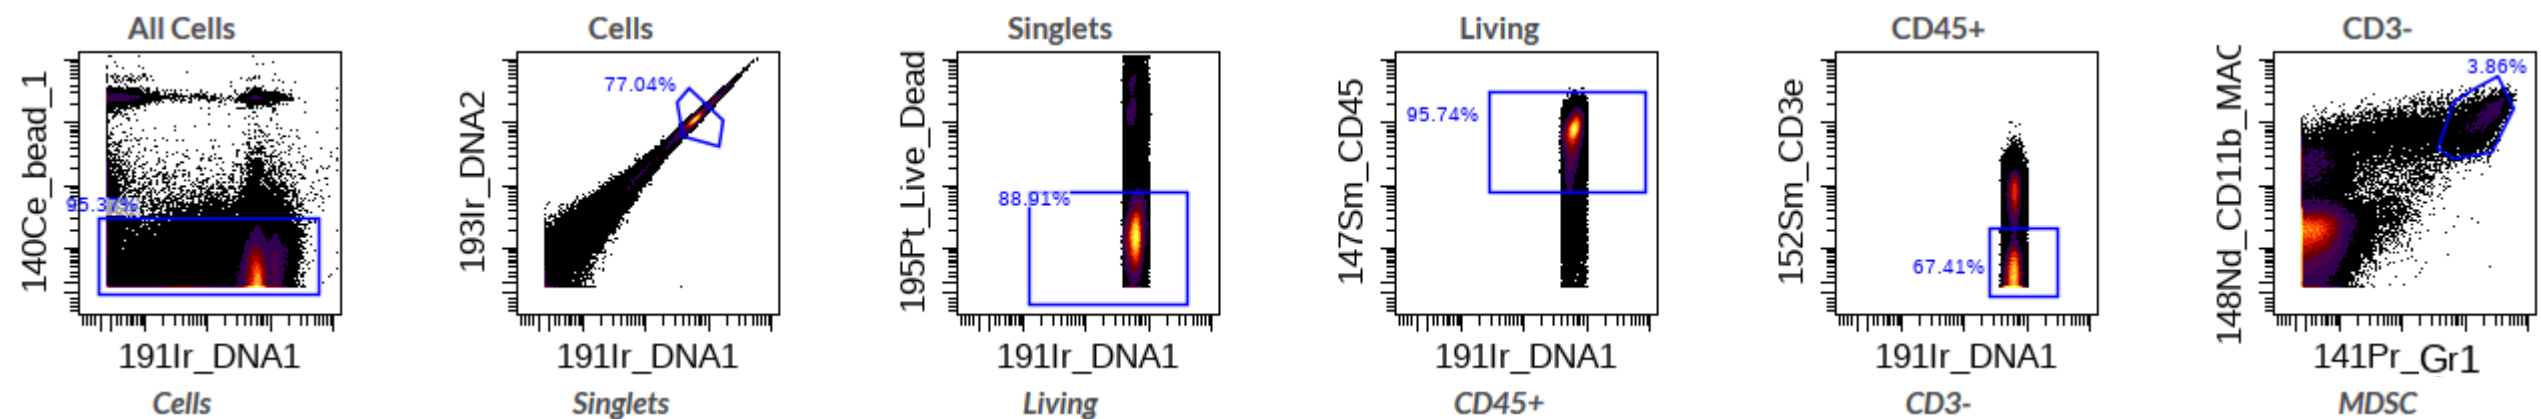

4T1

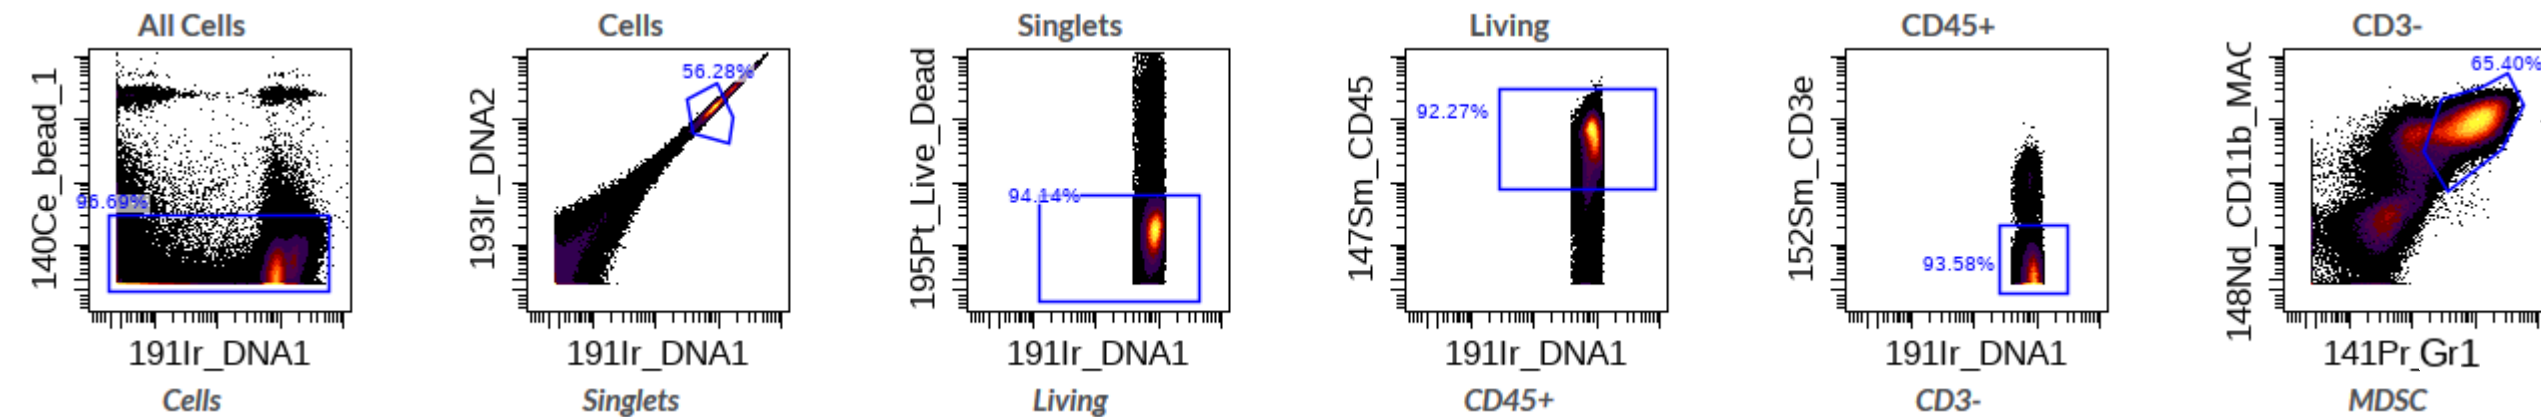

4T1  
+  
cisplatin

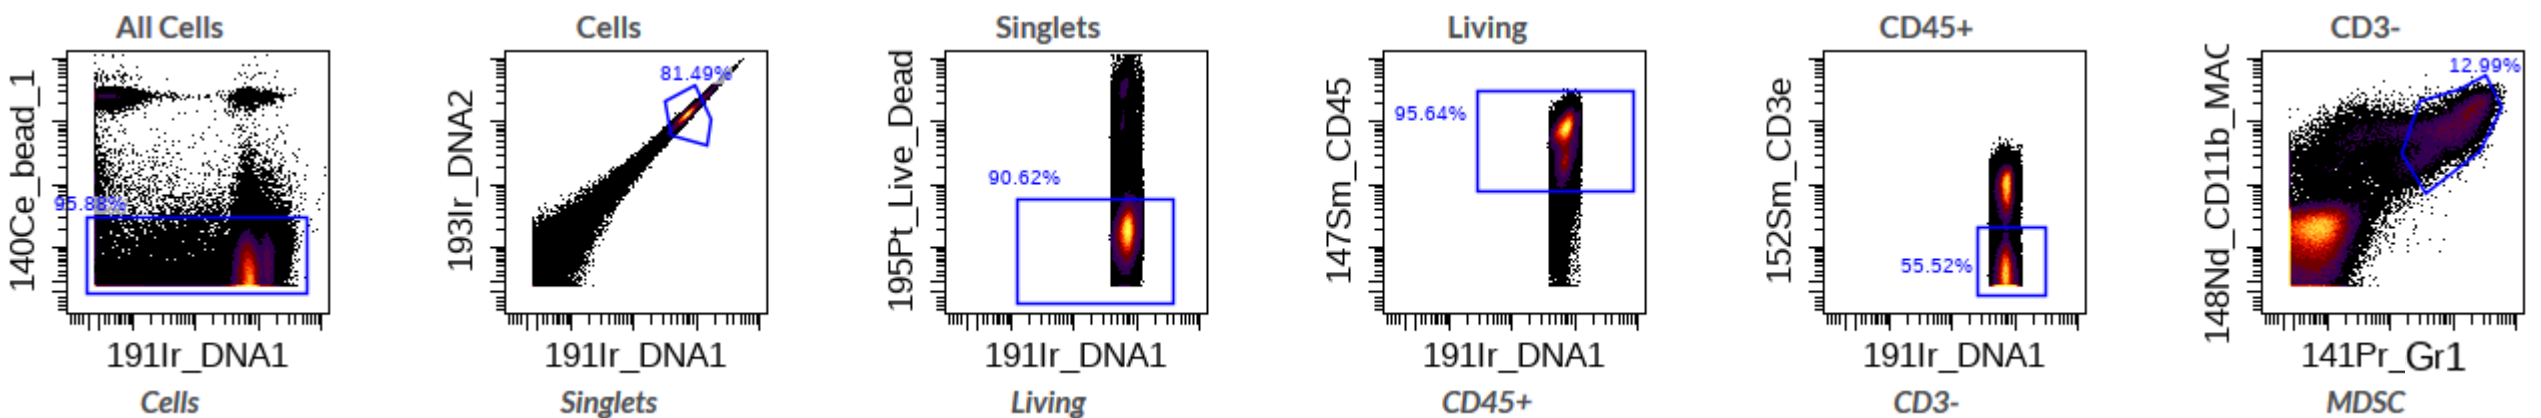

# CD44+ MDSCs

Naive

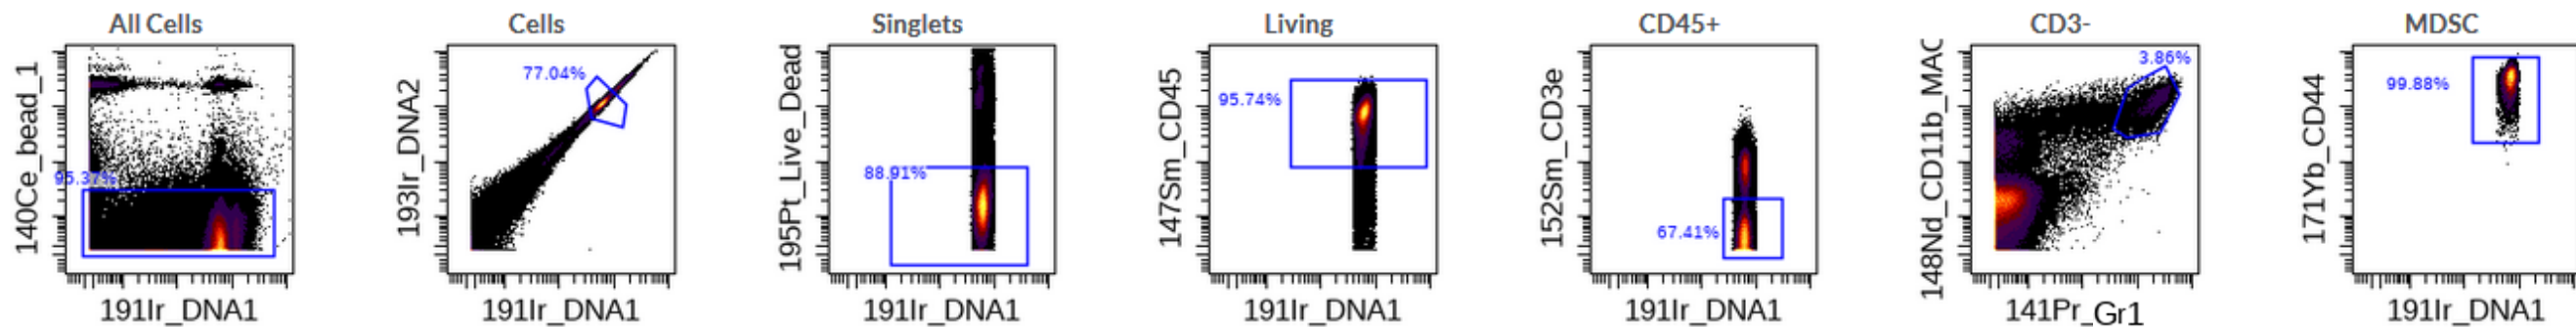

4T1

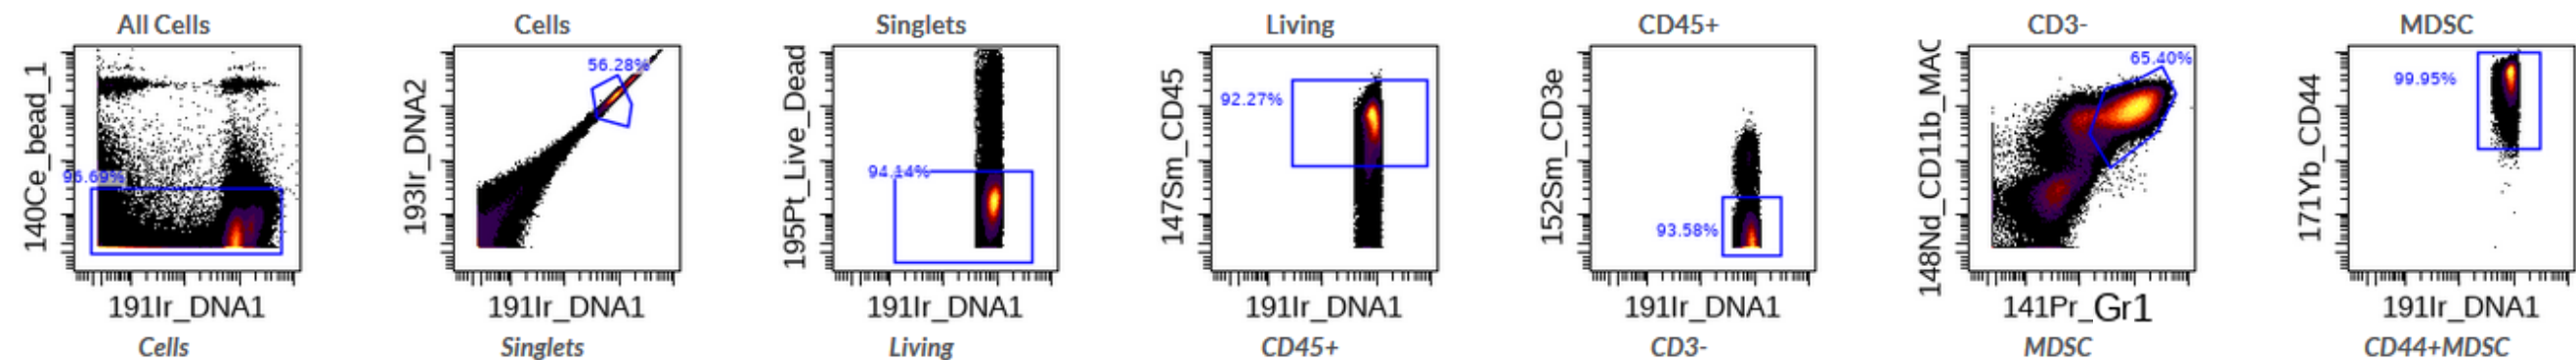

4T1  
+  
cisplatin

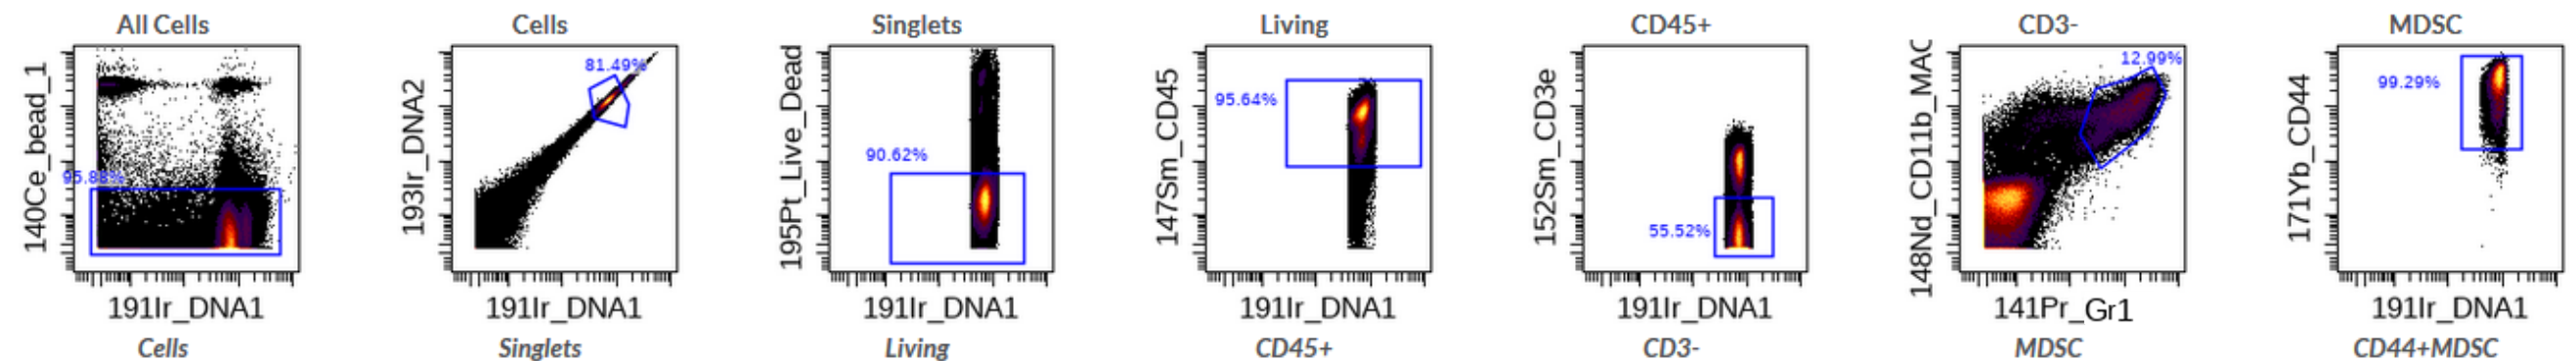

# Naive

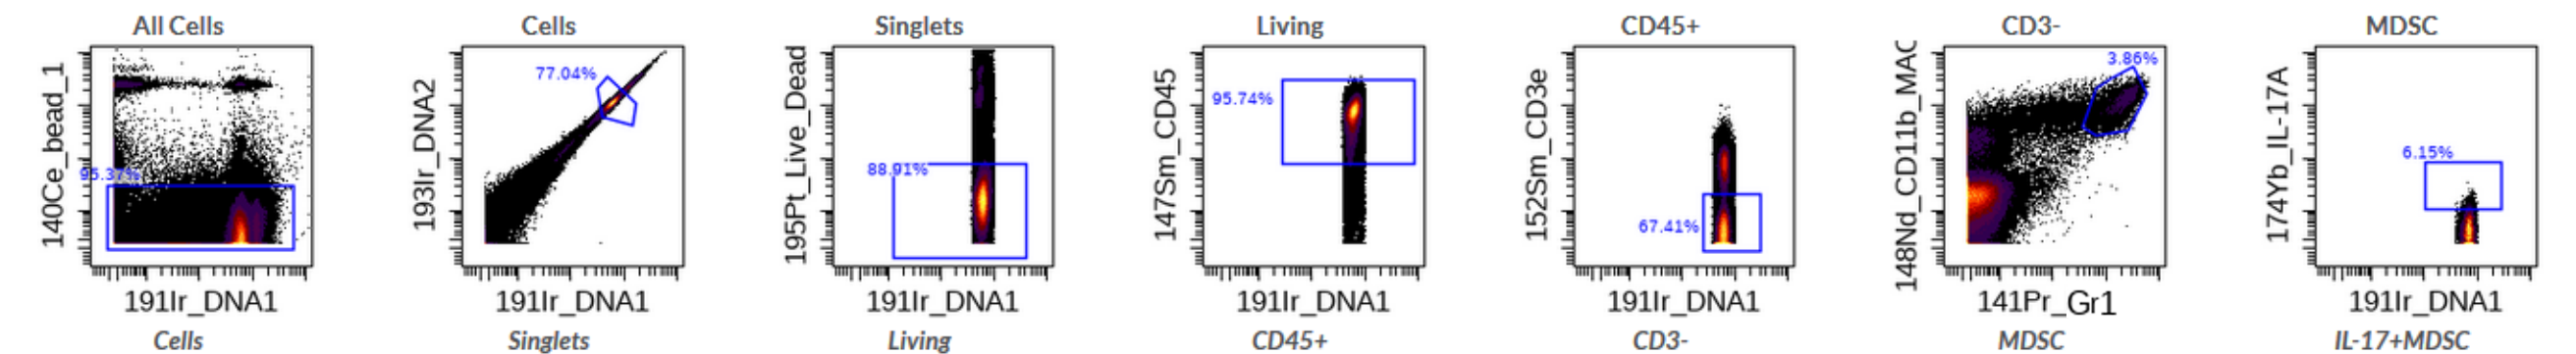

4T1  
+  
cisplatin

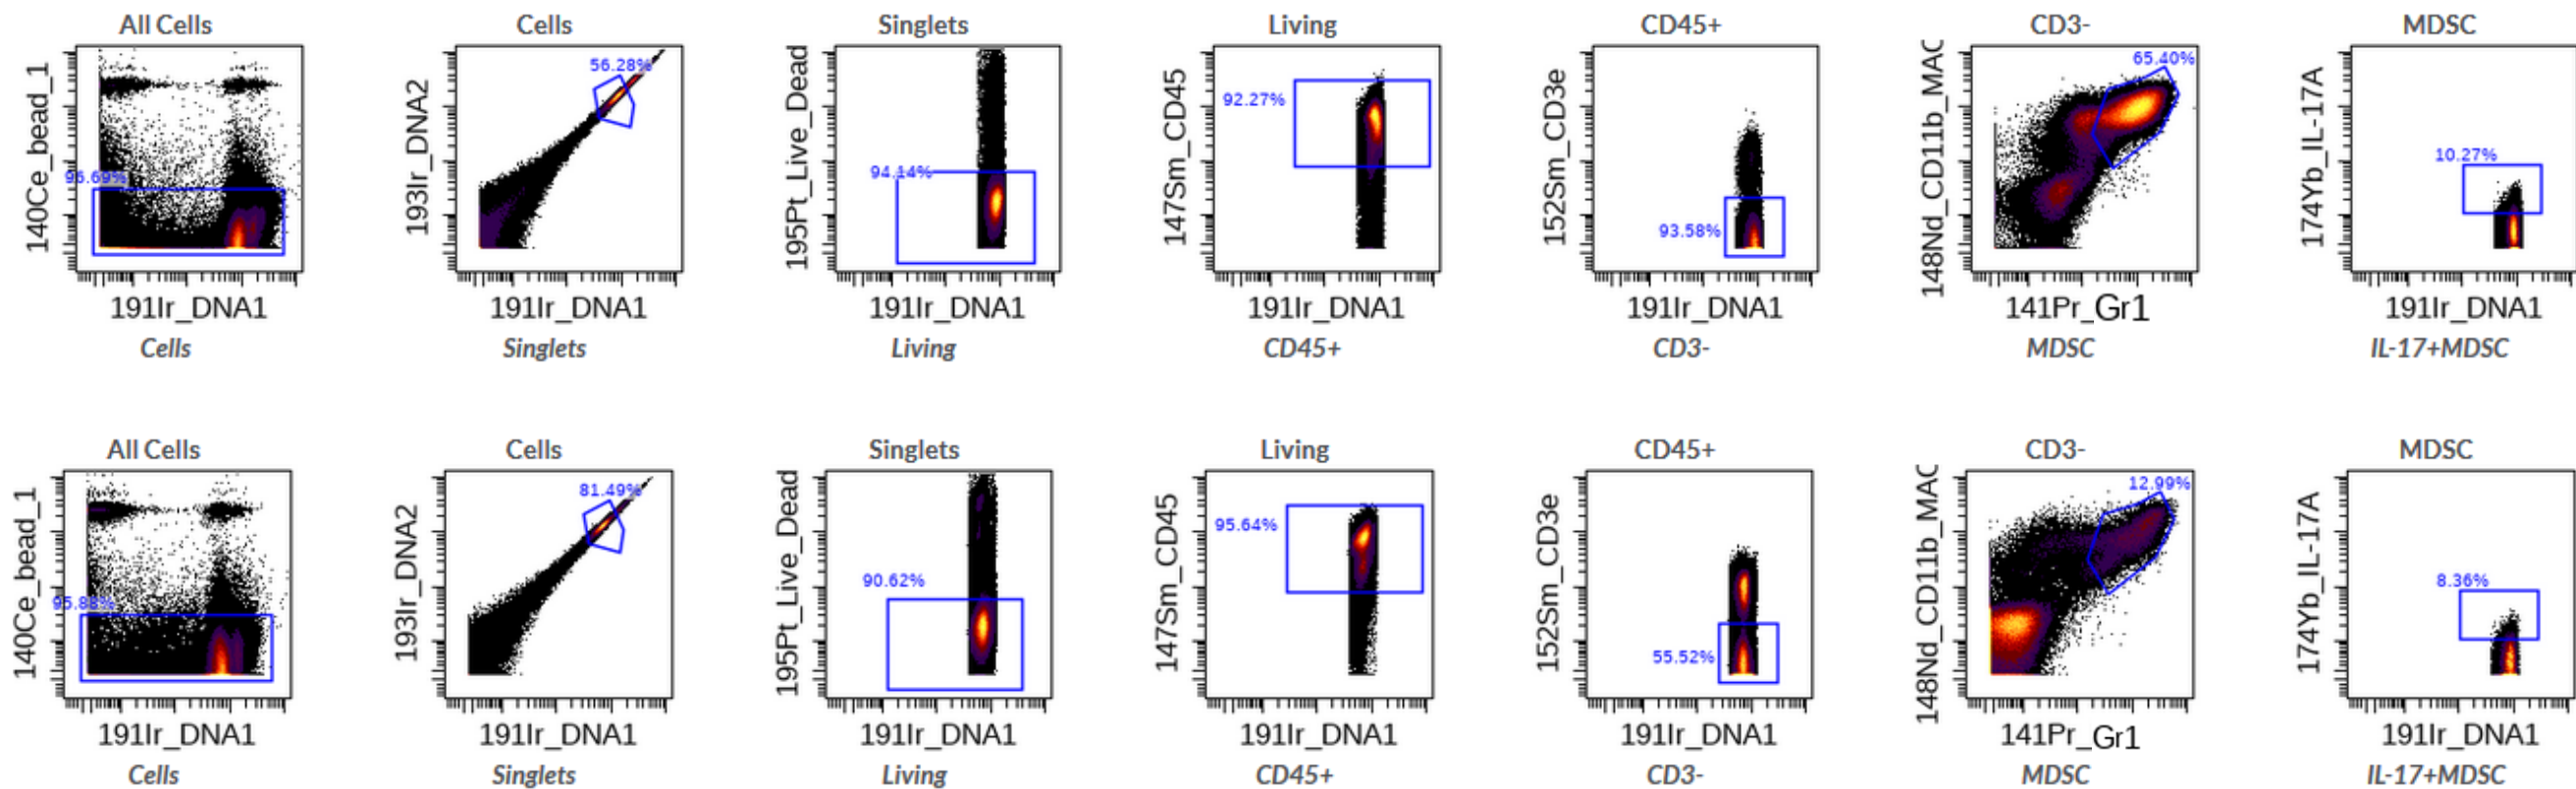



# B220+ B-cells

Naive

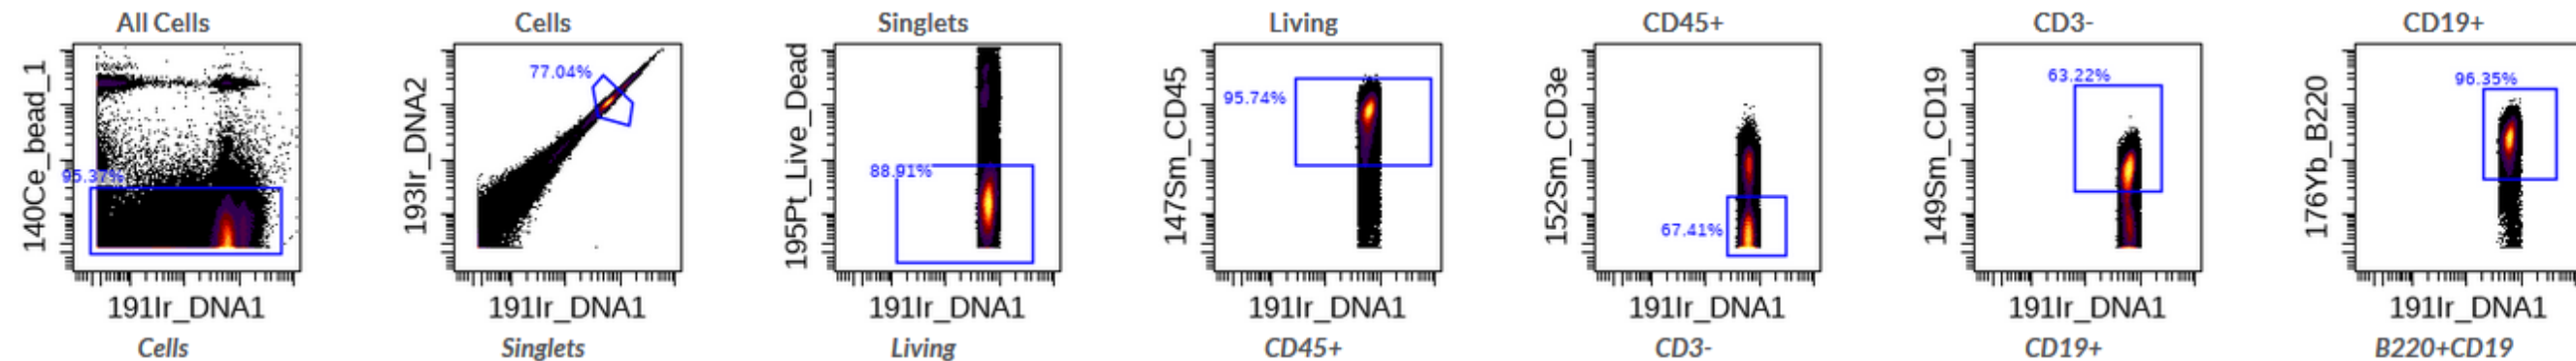

4T1

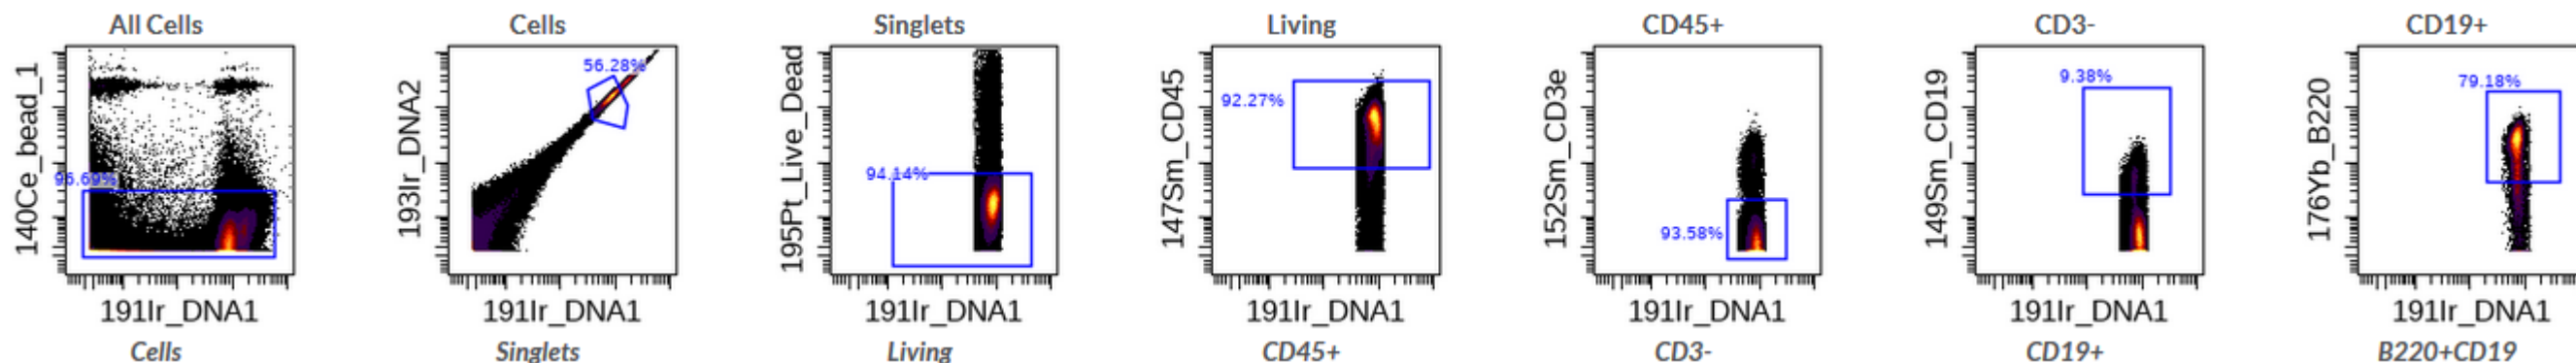

4T1  
+  
cisplatin

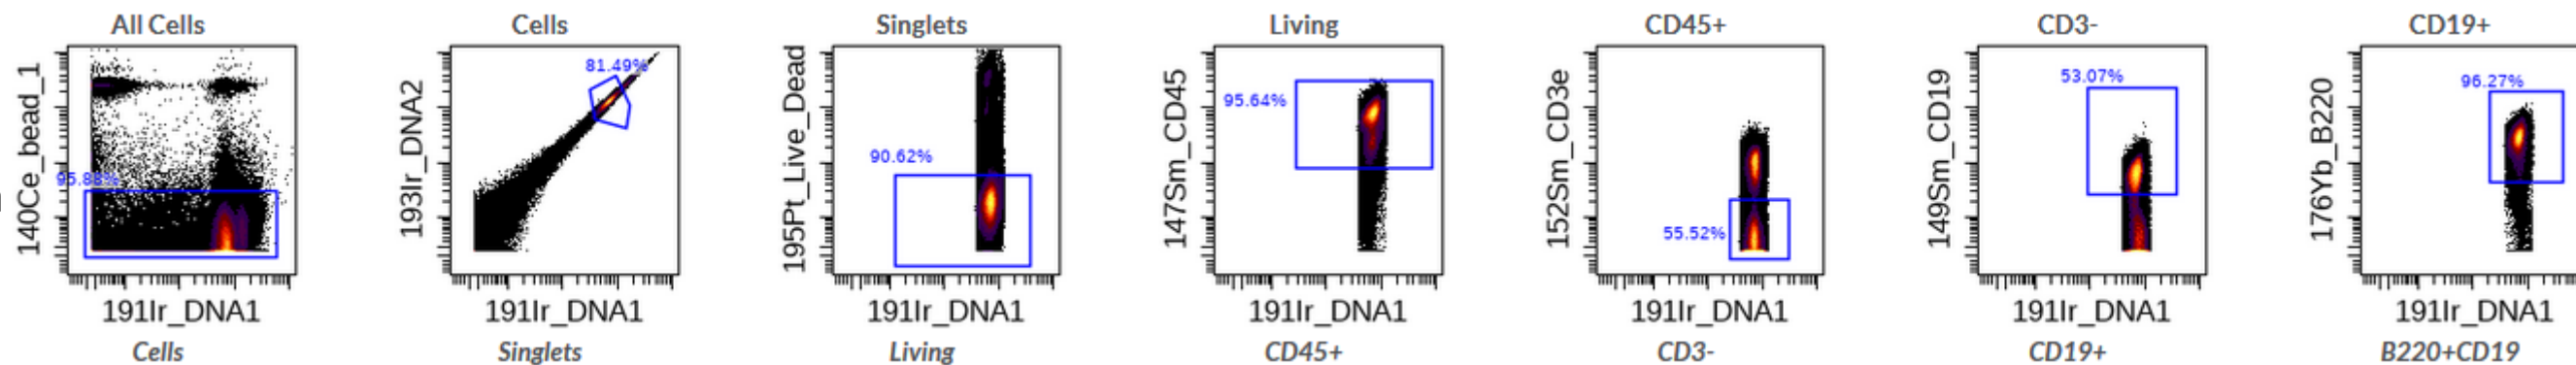

# CD62L+ B-cells

Naive

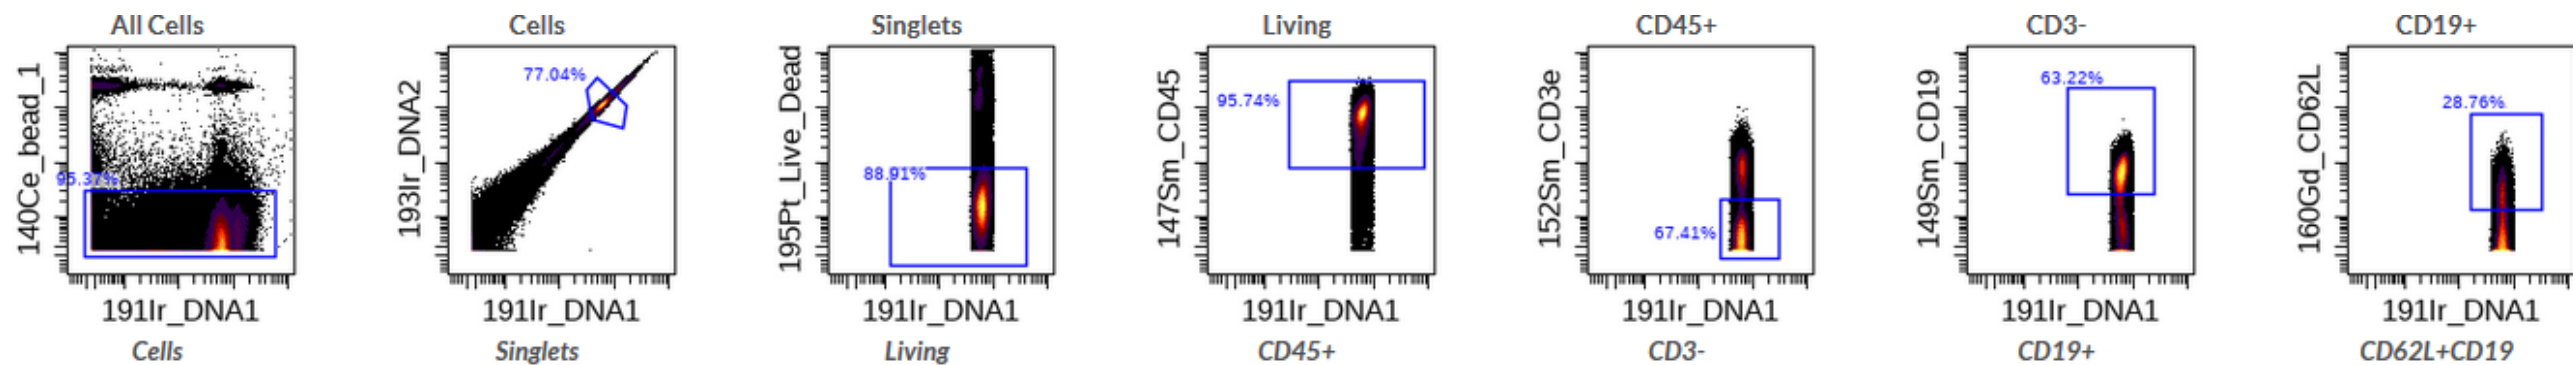

4T1

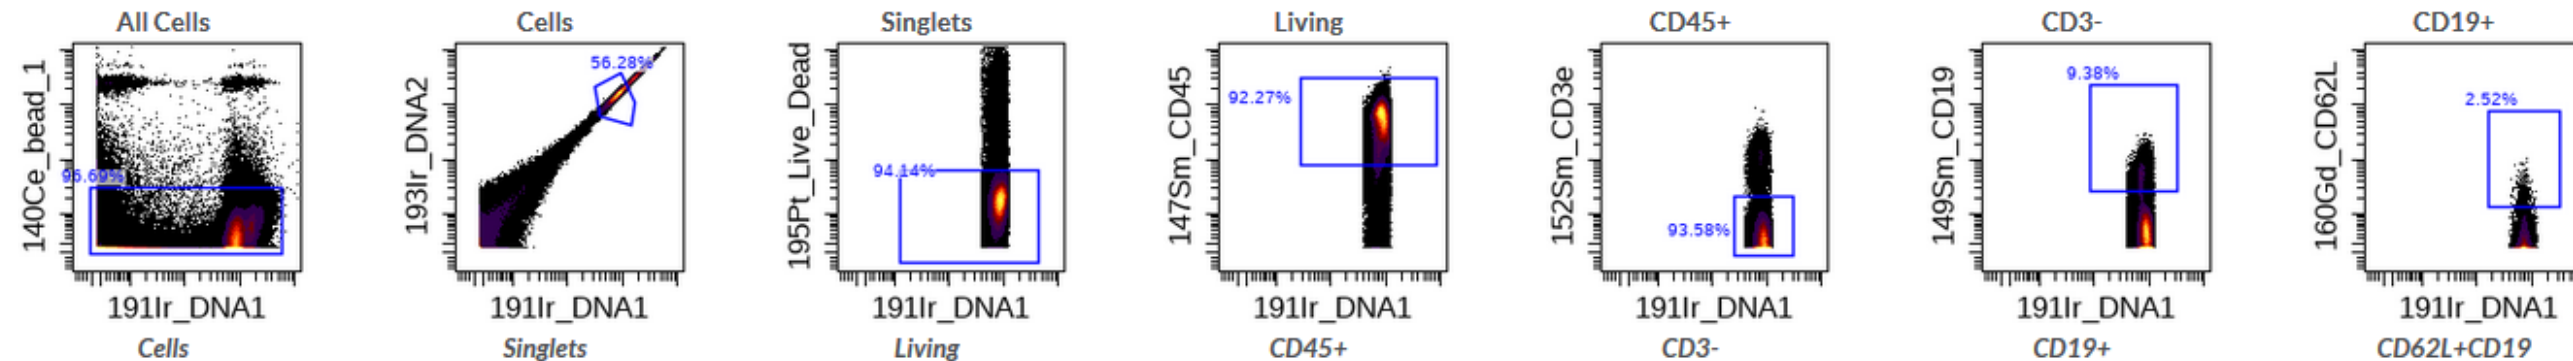

4T1  
+  
cisplatin

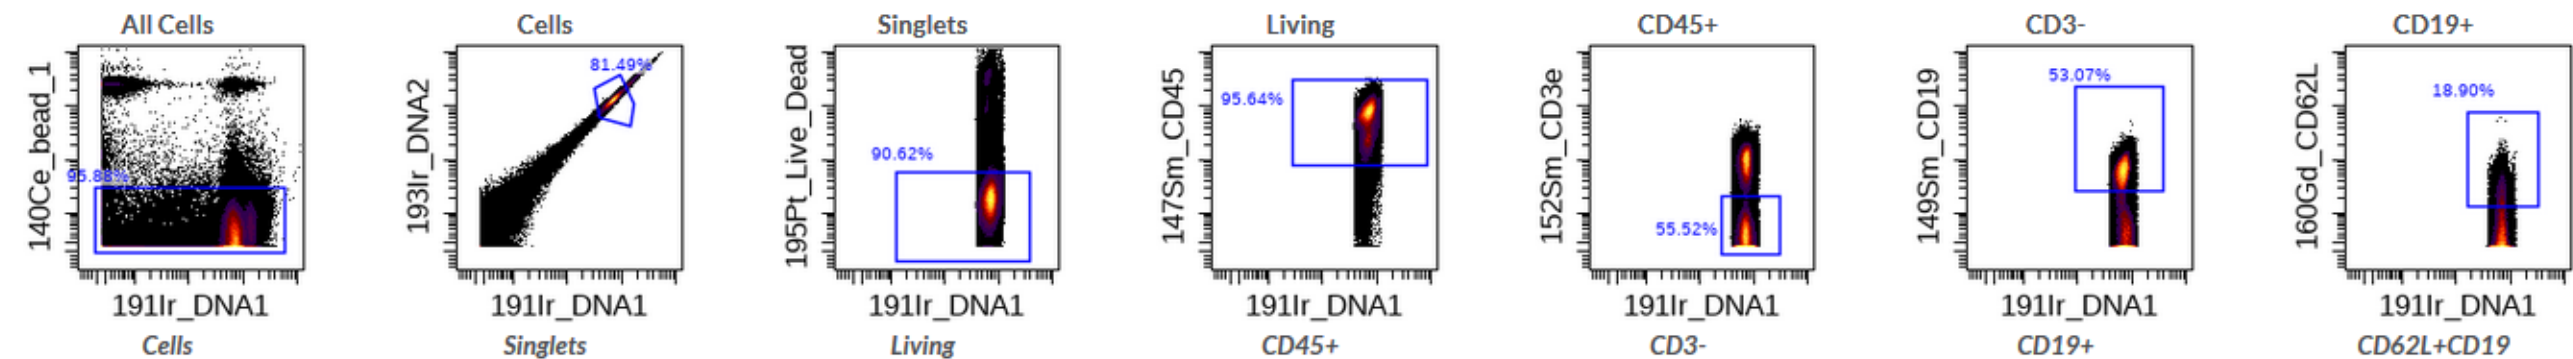

# CD62L+ CD4+ T-cells

Naive

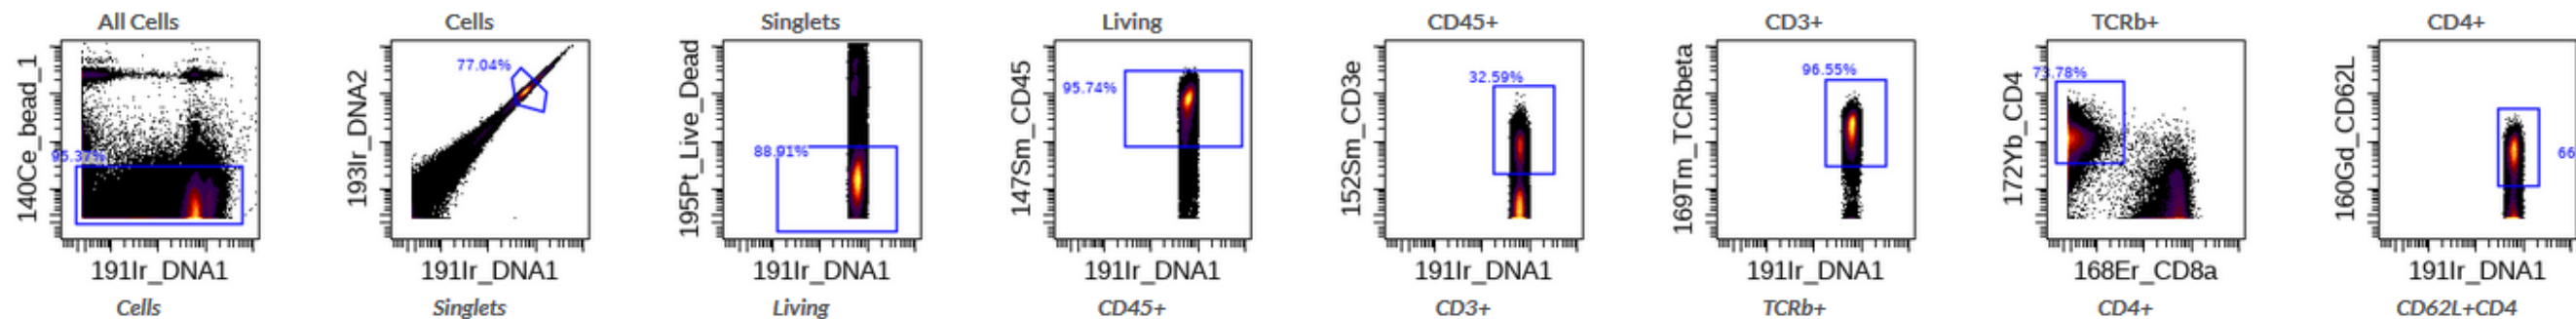

4T1

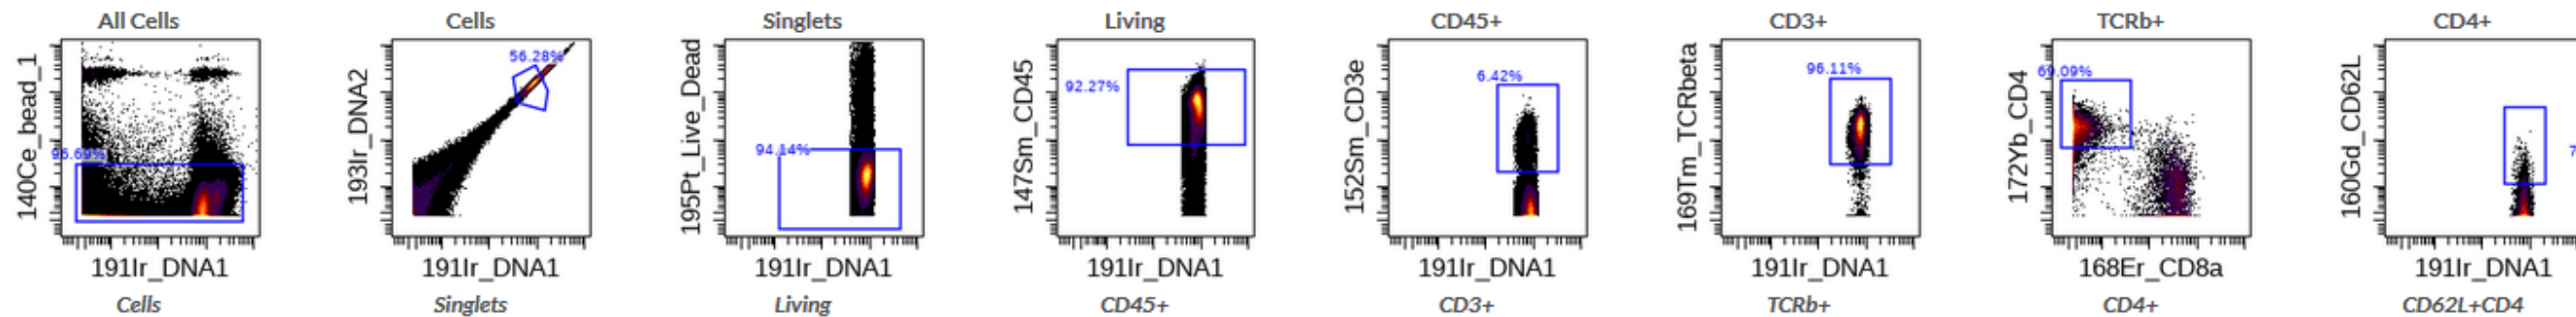

4T1  
+  
cisplatin

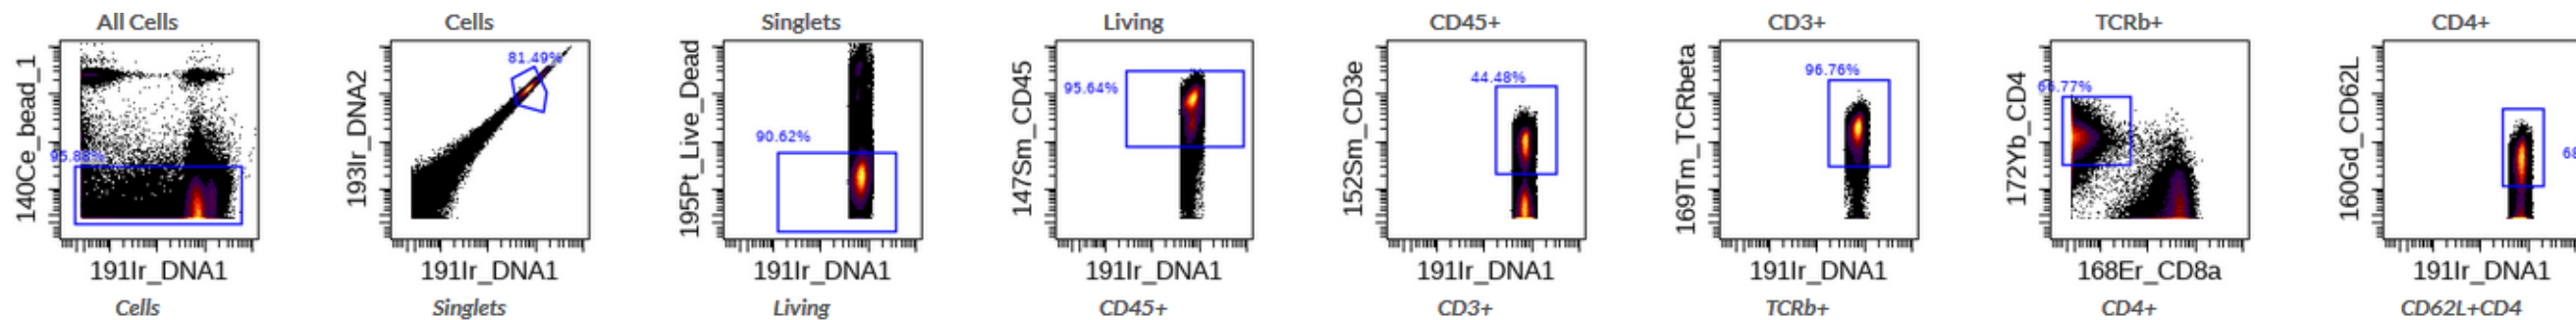



# CD62L+ CD8+ T-cells

Naive

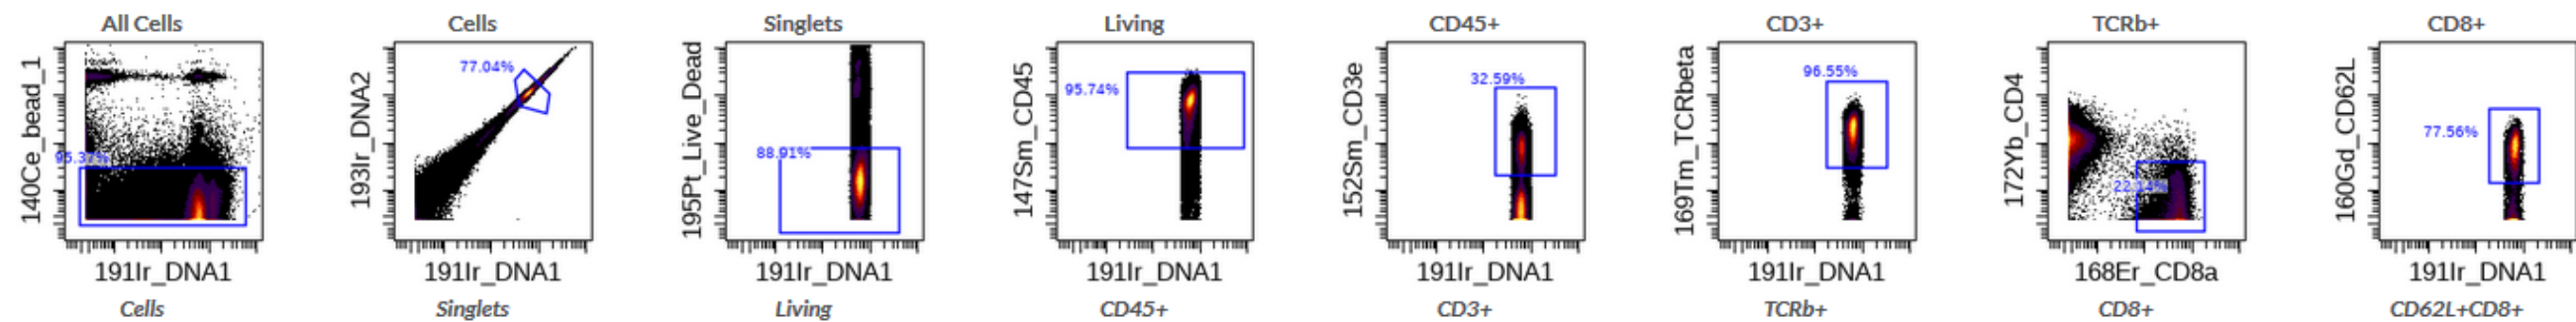

4T1

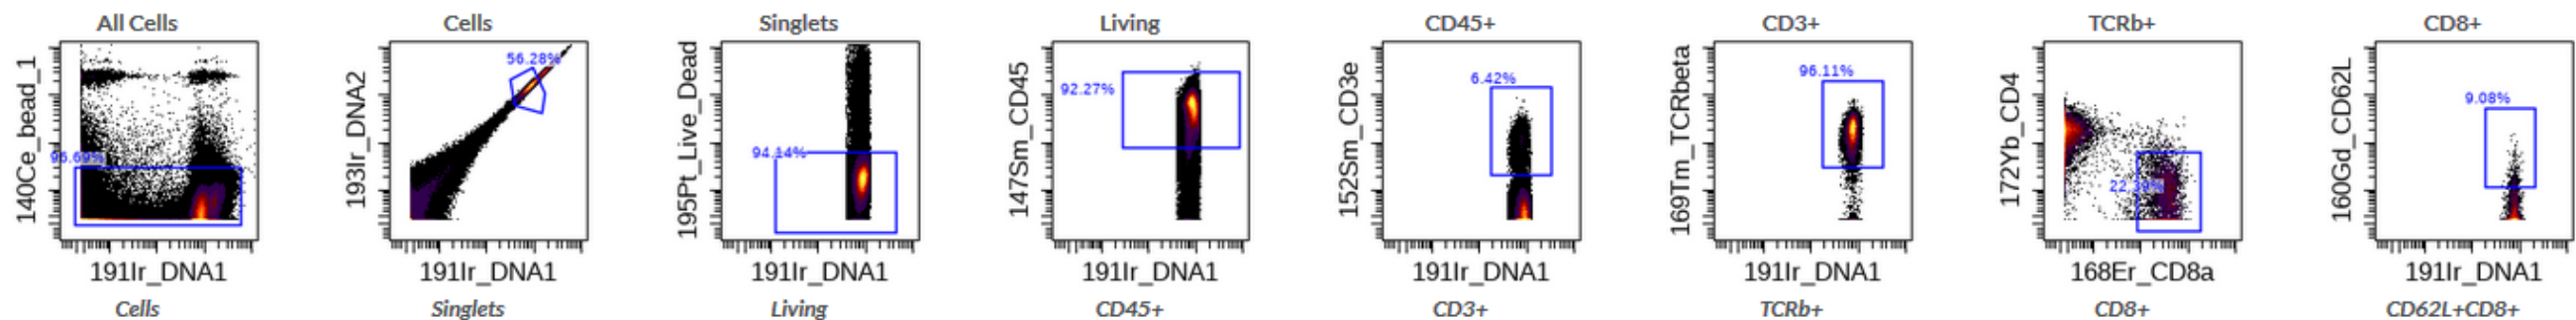

4T1  
+  
cisplatin

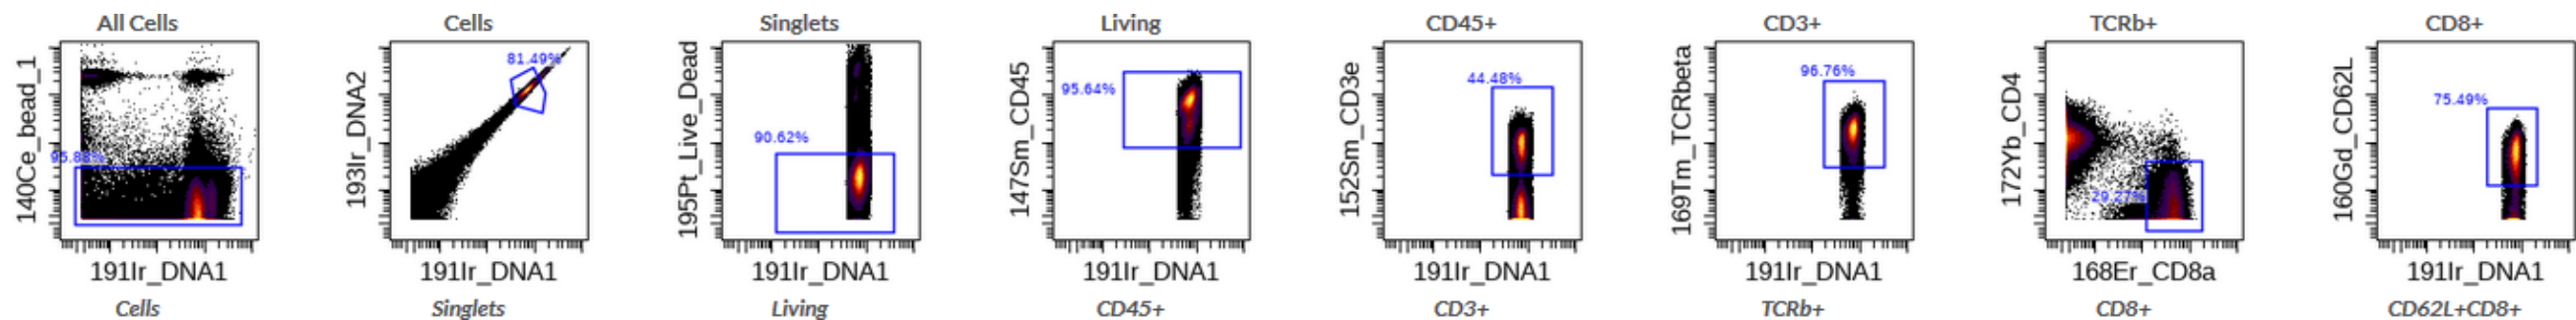

Supplement: s1 [file s1]
