# Supplementary material for: Single Cell Mass Cytometry Revealed the Immunomodulatory Effect of Cisplatin Via Downregulation of Splenic CD44+, IL-17A+ MDSCs and Promotion of Circulating IFN-γ+ Myeloid Cells in the 4T1 Metastatic Breast Cancer Model
Source: MDPI journal article supplement (doi:10.3390/ijms21010170), 2019-12-25

**Figure S1.** Dose-response curves of cisplatin treated 4T1 cells using xCelligence real-time electronic sensing assay

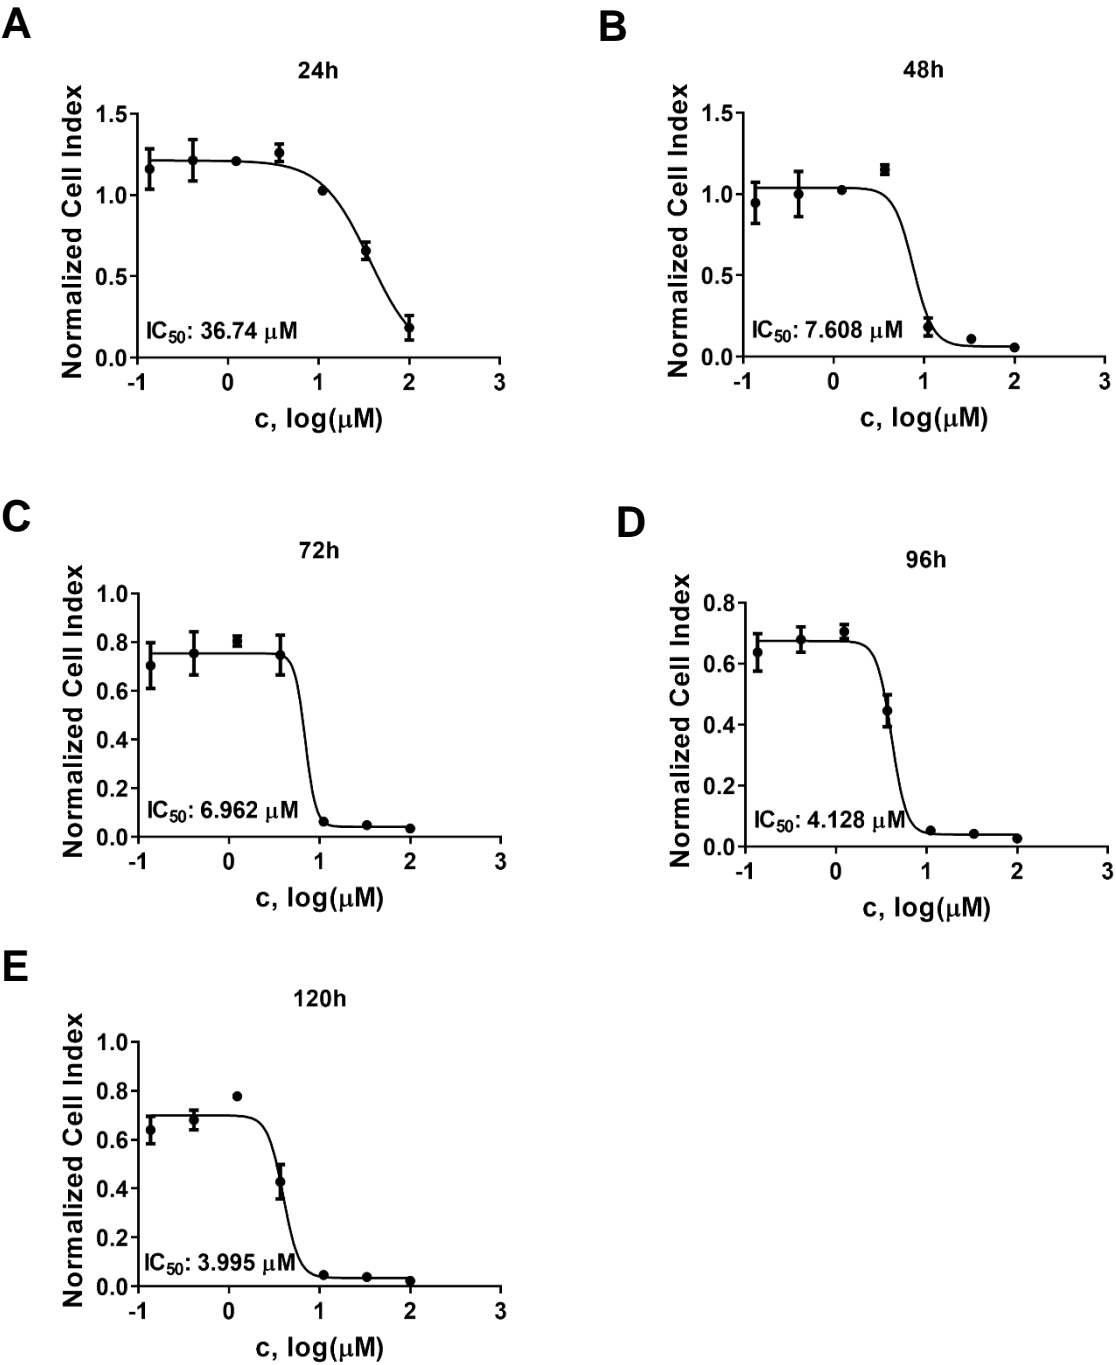

Supplement: s1 [file s1]
